# Supplementary material for: The EMT factor ZEB1 paradoxically inhibits EMT in BRAF-mutant carcinomas
Source: JCI journal article supplement (doi:10.1172/jci.insight.164629), 2023-10-22

# SUPPLEMENTARY INFORMATION

## FOR

### The EMT factor ZEB1 paradoxically inhibits EMT in *BRAF* mutant carcinomas

Ester Sánchez-Tilló<sup>1,2,3,\*</sup>, Leire Pedrosa<sup>4#</sup>, Ingrid Vila<sup>1#</sup>, Yongxu Chen<sup>1#</sup>, Balázs Györfy<sup>5#</sup>, Lidia Sánchez-Moral<sup>1</sup>, Laura Siles<sup>1</sup>, Juan José Lozano<sup>6</sup>, Anna Esteve-Codina<sup>7</sup>, Douglas S. Darling<sup>8</sup>, Míriam Cuatrecasas<sup>3,9</sup>, Antoni Castells<sup>2,3,10</sup>, Joan Maurel<sup>3,4</sup>, Antonio Postigo<sup>1,3,11,12,\*</sup>

<sup>1</sup> Group of Gene Regulation in Stem Cells, Cell Plasticity and Differentiation in Cancer, Dept. of Oncology and Hematology, IDIBAPS, Barcelona 08036, Spain.

<sup>2</sup> Group of Gastrointestinal and Pancreatic Oncology, Dept. of Liver, Digestive System and Metabolism, IDIBAPS, Barcelona 08036, Spain.

<sup>3</sup> Biomedical Research Network in Gastrointestinal and Liver Diseases (CIBEREHD), Carlos III National Health Institute (ISCIII), Barcelona 08036, Spain.

<sup>4</sup> Group of Translational Genomics and Targeted Therapeutics in Solid Tumors, IDIBAPS, and Dept. of Medical Oncology, Hospital Clinic, Barcelona 08036, Spain.

<sup>5</sup> TTK Cancer Biomarker Research Group, and Dept. of Bioinformatics and 2nd Dept. of Pediatrics, Semmelweis University, Budapest, Hungary.

<sup>6</sup> Bioinformatics Platform. Biomedical Research Network in Gastrointestinal and Liver Diseases (CIBEREHD), Carlos III National Health Institute (ISCIII), Barcelona 08036, Spain.

<sup>7</sup> CNAG-CRG, Center for Genomic Regulation (CRG), The Barcelona Institute of Science & Technology (BIST), Barcelona 08028, Spain, and Universitat Pompeu Fabra (UPF), Barcelona 08002, Spain.

<sup>8</sup> Dept. of Oral Immunology, and Center for Genetics and Molecular Medicine, University of Louisville, Louisville, KY 40202, USA.

<sup>9</sup> Group of Molecular Pathology of inflammatory conditions and solid tumours, Dept. of Oncology and Hematology, IDIBAPS, Barcelona, 08036, Spain and Dept. of Pathology, Hospital Clínic and University of Barcelona School of Medicine, Barcelona 08036, Spain.

<sup>10</sup> Dept. of Gastroenterology. Hospital Clinic and University of Barcelona School of Medicine, Barcelona 08036, Spain.

<sup>11</sup> Molecular Targets Program, Dept. of Medicine, J.G. Brown Cancer Center, Louisville, KY 40202, USA

<sup>12</sup> Catalan Institution for Research and Advanced Studies (ICREA), Barcelona 08010, Spain.

# LP, IV, YC and BG contributed equally as co-second authors to the work

\* **Corresponding authors:** E Sánchez-Tilló ([esanche3@recerca.clinic.cat](mailto:esanche3@recerca.clinic.cat), Phone: +34932275400 ext 4560) & A Postigo ([ldib412@clinic.cat](mailto:ldib412@clinic.cat), Phone: +34932275400 ext 3325). IDIBAPS. Rosselló 149-153, Barcelona 08036, Spain

**Running Title:** Opposing roles of ZEB1 in *KRAS* and *BRAF* mutant CRCs

**Keywords:** Colorectal carcinoma / mutant *KRAS* / mutant *BRAF* / ZEB1 / EMT / RAS-MAPK signaling

## **SUPPLEMENTARY METHODS**

### **Transgenic mouse models**

The following mouse models were used in this study. B6.129P2 (Cg)-Braftml1Mcmcm/J (reference 017837) (1), B6.129S4-Krastm4Tyj/J (reference 008179) (2) and B6.Cg-Tg (*Vil1*<sup>Cre</sup>) 1000Gum/J (reference 021504) (3) mice harboring a Cre-activated *Braf*<sup>V600E</sup>, Cre-activated *Kras*<sup>G12D</sup>, and Cre recombinase under the mouse *Vil1* promoter, respectively, were purchased from Jackson Laboratory (Bar Harbor, ME). *Vil1*<sup>Cre</sup> recombination restricts expression in villi and crypts of epithelial cells of the small and large intestine. No expression of the transgenes was found in other tissues. These mice were crossed with *ZEB1*<sup>+/-</sup> mice (4) to yield *Kras*<sup>LSL-G12D</sup>; *Vil1*<sup>Cre</sup>; *Zeb1*<sup>+/+</sup> (KVZ+/+), *Kras*<sup>LSL-G12D</sup>; *Vil1*<sup>Cre</sup>; *Zeb1*<sup>+/-</sup> (KVZ+/-); *Braf*<sup>LSL-V600E</sup>; *Vil1*<sup>Cre</sup> *Zeb1*<sup>+/+</sup> (BVZ+/+) and *Braf*<sup>LSL-V600E</sup>; *Vil1*<sup>Cre</sup>; *Zeb1*<sup>+/-</sup> (BVZ+/-) and were compared to *Kras* wild-type/*Braf* wild-type; *Vil1*<sup>Cre</sup>; *Zeb1*<sup>+/-</sup> (Z+/-) and/or completely wild-type *Kras* wild-type/*Braf* wild-type; *Vil1*<sup>Cre</sup>; *Zeb1*<sup>+/+</sup> (Z+/+). *Zeb1*<sup>+/-</sup> mice were used since homozygous animals die perinatally by respiratory failure, skeletal defects and impaired thymic T cell development. Phenotypic effects of *Zeb1*<sup>+/-</sup> have been observed in cancer (4). Mice survival endpoint criteria include a scoring system to establish disease progression and ethical sacrifice based on weight measure and observation (body posture, appearance, activity level, prolapse and diarrhea). Before tissues were collected at the indicated times, animals were weighed and the small intestine, colon, lung and liver were collected and washed several times with PBS. Length, weight and tumor dimensions were measured

previous to o/n 10% formalin-fixing and embedding in paraffin. Evaluation of mice biopsies was carried on blind by Patconsult BCN. SL. (Barcelona, Spain) and IDIBAPS' Tumor Bank core facility. DNA for genotyping was obtained from mouse ears with 25 mmol/L NaOH/0.2 mmol/L EDTA extraction at 98°C, 1 h plus 40 mmol/L Tris-HCl pH 5.5 as described previously (4). Primers used in PCR are described in Supplementary Table S11. PCR conditions were as follows: 10 cycles of 94°C 30 s, 64°C 30 s and 68°C 10 s plus 32 cycles of 94°C 15 s, 60°C, 30 s and 72°C 10 s.  $\delta EF1$ -null-lacZ monoallelic inactivated mice [*Zeb1*<sup>+/-</sup>] were genotyped for WT using Pro1 and TM1 and mutant using Pro1 and LacZ-B primers. PCR conditions for *Zeb1* were as follows: 35 cycles of 94°C for 30 s, 60°C for 1 min and 72°C for 40 s. PCR was performed either using AccuStart II Taq DNA polymerase (Quanta Biosciences) or Dream Taq DNA polymerase (Life Technologies, Thermo Fisher Scientific, Carlsbad, CA) or Maxime TaqDNA polymerase (Intron Biotechnology) with 2 mmol/L MgCl<sub>2</sub>, 0.2 mmol/L dNTPs and 1.25  $\mu$ mol/L primers in a final volume of 25  $\mu$ l. DNA was separated in 2% agarose gel with RedSafe Nucleic Acid Staining Solution (INtRon Biotechnology) in TBE (TrisBase, Boric Acid, EDTA) at 100 V for 30 min. Animal survival was plotted using Kaplan Meier survival curve as indicated in the statistic section.

### **Xenograft mouse models**

Xenograft studies were performed using both three 4-week male and three female outbred Athymic Nude (CrI:NU(NCr)-Foxn1<sup>nu</sup>) obtained from backcrossing of male homozygous athymic nude (strain code 490, Charles River) and female

heterozygous athymic nude (strain code 491, Charles River). A total of  $2 \times 10^6$  LS174T or RKO cells interfered with an shRNA control (CTL) or an shRNA specific for *ZEB1* (*ZEB1KD*) mixed in 1:1 dilution with 50% Cultrex reduced growth factor basement membrane extract type 2 (BME2) (R&D Systems) were subcutaneously injected in flanks of the same mice. Tumor volume calculated as  $\text{length} \times \text{height}^2 \times 0.5236$  was measured every 3-4 days with a caliper. When tumors reached  $1.5 \text{ cm}^3$ , mice were euthanized and tumor volumes ( $\text{length} \times \text{width} \times \text{height}$ ) were measured *ex vivo*.

### **Human CRC patients and samples**

This study includes a retrospective cohort of patients diagnosed with *BRAF* mutant and *KRAS* mutant metastatic CRC between February 2016 and February 2020 at the Hospital Clínic of Barcelona. Data collection of patients was censored on November 2020. Clinical-pathologic information of these patients was prospectively collected from the registry database at the Hospital Clínic of Barcelona and summarized in Supplementary Table S4. Key eligibility criteria included a diagnosis of stage IV disease with histologically confirmed adenocarcinoma within the colon or rectum. Clinical parameters utilized to initially evaluate the patient's performance were: sex, age, Eastern Cooperative Oncology Group (ECOG) performance status, stage at diagnosis and metastatic organ type.

### **Targeted next generation sequencing of *BRAF* and *KRAS* mutant CRCs**

The Oncomine Solid Tumor DNA kit was used to sequence a panel of 22 genes, which include commonly mutated genes in CRC except for the *APC* gene. Tumor DNA was extracted from formalin-fixed paraffin-embedded (FFPE) unstained sections of primary CRC specimens, using the QIAmp® DNA FFPE kit (Qiagen, Hilden, Germany) and then quantified with Qubit® fluorometer assay (Thermo Fisher Scientific, MA, USA). Amplicon sequencing libraries were prepared from 10 ng of input DNA per sample (minimum of 0.83 ng/µl DNA concentration) using specific primers from the Oncomine Solid Tumor DNA kit (Thermo Fisher Scientific, MA, USA). Libraries were sequenced using the Ion Torrent Personal Genome Machine platform (ThermoFisher Scientific) at the Genomics Facility at IDIBAPS. Data were analyzed using the Ion Reporter Software (ThermoFisher Scientific) according to the manufacturer's instructions. Mean coverage was 500X. Raw data files processing and downstream analyses were performed using the Torrent Suite Software version 4.0.2 automated pipeline, including adapter trimming, QC and alignment to GRCh37/hg19 reference genome. Single-nucleotide variants (SNVs) and short insertions and deletions (indels) were identified and annotated with the Ion Reporter Software (ThermoFisher Scientific) according to the manufacturer's instructions. All detected variants were filtered and prioritized according to a minimal coverage depth of 100X, variant allele frequency (VAF) of at least 4%, a frequency in normal population <1% based on ExAC, presence in COSMIC and functional pathogenicity consequences reported in the ClinVar database.

### **CRC cell lines and cell culture**

Colorectal cancer (CRC) cell lines were obtained from the Cancer Cell Line Repository at the Barcelona Biomedical Research Park (Barcelona, Spain), which conducts routine tests for cell line authentication. LS174T and RKO cells were cultured in Dulbecco's modified Eagle medium (DMEM) (Lonza, Basel, Switzerland) with 10% Fetal Bovine Serum FBS (Sigma-Aldrich, St. Louis, MO) and 1% Penicillin-Streptomycin (Lonza). Cells were trypsinized with 0.05% trypsin/EDTA solution (Lonza). Cells were periodically tested for mycoplasma with e-Myco TM plus Mycoplasma PCR detection kit (iNtRON Biotechnology, Gyeonggi-do, South Korea). Wherever indicated, cells were treated for 24 h with 25  $\mu$ mol/L PD98059 (Calbiochem, Millipore) or 50  $\mu$ mol/L LY294002 (Tocris-Biotechnique, Bristol, UK) dissolved in DMSO.

### **Stable and Transient Transfection and/or Interference of CRC cell lines**

Plasmid DNA isolation was performed using PureYield Plasmid Maxiprep System (Promega) and integrity was checked in Nanodrop and 1% agarose gel. For lentiviral production,  $16 \times 10^6$  293T cells in 150 cm plates were used to transfect 20  $\mu$ g vector hairpin FCIV or FCIV-*BRAF*<sup>V600E</sup>-His-Amp<sup>R</sup> (gifted by Dr. J. Verdaguer, Immunology and Immunopathology Group (GRIIP), Lleida University, Lleida, Spain) or puro*KRAS*<sup>G12D</sup> (gifted by S. Barbacid, CNIO, Madrid, Spain) along with 10  $\mu$ g envelop plasmid pMD2G [a gift from Didier Trono, (EPFL, Lausanne, Switzerland) (Addgene plasmid # 12259; <http://n2t.net/addgene:12259>; RRID:Addgene\_12259)] and 10  $\mu$ g packaging plasmid pCMV-dR8.2 dvpr [a gift from Bob Weinberg

(Massachusetts Institute of Technology, MA, USA) (Addgene plasmid # 8455; <http://n2t.net/addgene:8455>; RRID:Addgene\_8455)] using Lipofectamine 2000 or 3000 (Invitrogen ThermoFisher, Carlsbad, CA) and OPTIMEM. Cells were incubated o/n and viral supernatants were collected after 72 h and filtered using a 0.45 µm filter. Supernatants were centrifuged at 25,000 rpm for 90 min and the pellet was resuspended. Supernatants were used to infect indicated 50% confluent cells in 12 well plates in the presence of 5 µg/ml polybrene (Sigma-Aldrich). Stable transfection was positively selected in 10 µg/ml Puromycin (Sigma-Aldrich) every 3 d for 2 wk. Stable lentiviral infections of *ZEB1* were a pool of three shRNAs against human *ZEB1* or an shRNA control, whose sequence is described in Supplementary Table S12 in parallel to shCtl lentivirus. For siRNA transfection with Lipofectamine RNAiMAX (ThermoFisher, Waltham, MA), 70% confluent cells were transfected with 100-200 nmol/L siRNA complexes with RNAiMAX using OPTIMEM media (Gibco) in the presence of antibiotics. siRNA used are described in Supplementary Table S13. siRNAs used were transfected in parallel to a control siRNA siCtl. After 48-72 h, DNA- or siRNA/shRNA-transfected cells were collected for analysis.

### **Tissue Immunostaining**

Slides of 4 µm thickness from mice paraffinized tissues were sectioned at the IDIBAPS' Biobank core facility using a Microtome (Leica Biosystems) with feather R35 disposable blades (Casa Alvarez, Madrid, Spain) and poly-L-lysine slides Menzel Gläser (VWR). Human and mouse biopsies were xylene deparaffinized and hydrated in sequential EtOH:H<sub>2</sub>O dilutions. After epitope heat retrieval for 5 min with

10 mmol/L Sodium citrate pH 6 and 15 min endogenous peroxidase blockage with 0.3% H<sub>2</sub>O<sub>2</sub>/MeOH (for IHC) or 0.1% sodium borohydride NaBH<sub>4</sub> (for IF), blocking was performed with 5% goat or donkey serum (Jackson ImmunoResearch Europe) in PBS/0.5% Tween/4% BSA buffer. It was followed by primary Ab incubation in blocking buffer overnight at 4°C or 1 h at r.t. Staining was detected using corresponding donkey anti-mouse, rabbit or goat secondary IgG (H+L)-HRP (Jackson ImmunoResearch Europe) at 1:200 dilution, 1 h at 37°C in blocking solution followed by DAB chromogen kit (Vector Labs, Burlingame, CA) or NeoLink-2 Plus HRP broad with DAB kit (CliniSciences). After counterstaining with Gill's Hematoxylin (Sigma-Aldrich), slides were dehydrated and mounted with DPX Mountant for histology (Sigma-Aldrich). For IF, goat IgG-Cy3 was used (at 1:200 dilution, 1h at 37°C in blocking solution) followed by DAPI counterstaining and mounting with Fluorlast mounting media (Quimigen). H&E staining was performed by incubating hydrated tissues with H&E followed by EtOH/LiCl staining and washing with EtOH. For Goblet cell detection, slides were stained with Alcian blue pH 2.5 mucin stain (Abcam) for 30 min at r.t. followed by staining with O safranin solution. Photographs were collected using a bright field Olympus BX41TF microscope and Cell Sens software (Olympus America Inc., Melville, NY). The mean intensity or % of DAB area were quantified using Image J or Fiji by deconvoluting images for HE DAB, adjusting the threshold and applying a watershed in binary images. The antibodies used in the study are in Supplementary Table S14.



## **Western blot assays**

Cells were lysed using RIPA lysis buffer (150 mol/L NaCl, 50 mmol/L Tris HCl pH 7.4; 0.5% SDS, 0.5% NaDeoxycholate, 1% NP40 and 0.8 mmol/L EDTA pH 8) with protein inhibitors (10 µg/ml Leupeptin, Aprotinin, Pepstatin and PMSF). Protein supernatants were quantified using A562 nm with Pierce BCA Protein assay kit (ThermoFisher) or A595nm with Bradford kit (Bio-Rad). Lysates were boiled, loaded into 12% acrylamide separating gel and transferred to PVDF membranes (Immobilon-P, Millipore, Bedford, MA) using CAPS buffer pH 11 + 10% MeOH. After blocking for 1 h at r.t. with 5% non-fat milk in TBST (137 mol/L NaCl, 20 mmol/L Tris, 0.1% Tween-20, pH 7.6), primary Abs in TBST were incubated at 4°C o/n or 1 h at r.t. Detection was performed using secondary Peroxidase-AffiniPure donkey anti-mouse IgG (H+L), peroxidase-AffiniPure goat anti-rabbit IgG (H+L) (1:5000-10000) (JIR-Jackson ImmunoResearch Europe, Newmarket, UK) for 1 h at r.t.. The chemiluminescent reaction was developed using Clarity™ ECL Western Blotting Substrate (Bio-Rad, Hercules, CA) and X-Ray Films (Rosex). The antibodies used in the study are listed in Supplementary Table S11. Western figures are representative of at least three independent experiments.

## **RNA isolation, RT-PCR, real-time PCR**

Total RNA from cell lines was obtained with RNAzol® RT reagent (Sigma-Aldrich) or Purezol® (Bio-rad) by Isopropanol precipitation and EtOH washing and was reverse transcribed. Total RNA was quantified, and its quality was checked by Nanodrop 2000c (ThermoScientific) at A260/230 >1.6 and A260/280 >1.8. After

DNase treatment of RNA following the manufacturer's protocol (Promega), cDNA was synthesized using iScript cDNA synthesis kit (Bio-Rad) or SuperScript IV Reverse Transcriptase (Invitrogen Life Technologies) or High Capacity cDNA reverse transcription kit (Life Technologies) following manufacturer's instructions using random primers. qPCR reactions were performed either in a Light Cycler 96 (Roche) or in a Bio-Rad Chromo-4 real-time PCR machine using iTaq Universal SYBR Green supermix (Bio-Rad) or GoTaq® qPCR Master Sybr Green Mix (Promega) with the following conditions: 95°C for 30s, 38 cycles of 95°C for 15 s followed by 60°C for 30 s. RT-PCR was performed using Master Sybr Green Mix. Data were analyzed with Light Cycler 96 (Roche) or Opticon Monitor v3.1.32 software (Bio-Rad) for absolute quantification by  $\Delta\Delta C_t$  method normalizing values with *GAPDH* as housekeeping gene and Melting curve analysis. Graphs of RT-PCR show the average of a minimum of three experiments run in triplicate. Oligonucleotides were previously published in indicated reference or in [pga.mgh.harvard.edu/primerbank/](http://pga.mgh.harvard.edu/primerbank/) and PrimerDepot database. They were purchased from Sigma-Aldrich, IdT Costar or ThermoFisher Scientific and their sequences are detailed in Supplementary Table S15.

### **RNA sequencing and bioinformatics analysis**

For RNA sequencing (RNAseq), total RNA was isolated and its quality (RIN 8-10) was checked using Agilent 2100 Bioanalyzer (Agilent, Santa Clara, CA) at Genomic Platform. Quantitative determination of differentially expressed genes by RNAseq was done with Stranded mRNA-seq >20M reads (HiSeq 2000, 2x75 bp read length)

(Illumina Inc., San Diego, CA) in triplicate at National Center of Genomic Analysis (CNAG, Scientific Park of Barcelona). RNA-seq reads were mapped against the human reference genome (GRCh38) using STAR (version 2.5.3a) (22) with ENCODE parameters. Genes were quantified using RSEM (version 1.3.0) (5) with default parameters. The human gene annotation file was downloaded from Gencode release 35 (<https://www.gencodegenes.org/>). Mapping and quantification quality checking was performed with GEMTools (<https://gemtools.github.io/>) and custom Python scripts. Differential gene expression was performed with 'limma-voom' (6) and the function 'duplicateCorrelation' for intrablock correlation. Genes with FDR<5% were considered differentially expressed between conditions. Gene set enrichment analysis was done with the fgsea R package (7) with a pre-ranked "limma t-statistic" gene list. Category Netplot (cnetplot) was done with clusterProfiler in R with DEG from RNAseq (8). A category network was performed with the oncogenic signature gene set from GSEA. Boxplot of the ssGSEA (9) score for the EMT signature were built. Welch student t-test were employed to check statistical significance. The RNAseq is available in National Center for Biotechnology Information (NCBI)'s Gene Expression Omnibus (GEO) with accession number GSE123416.

### **Cell viability, cell cycle and apoptosis assays**

For cell viability MTT assays,  $1 \times 10^4$  cells were seeded in 96 well plates in triplicate per condition and incubated during 4 d. 5 mg/ml MTT (Sigma-Aldrich) was added and incubated for 1-4 h at 37°C till the formation of formazan blue precipitates. After

adding DMSO, A560 nm for MTT and A750 nm for background noise were measured using the Modulus II Glomax microplate reader (Promega). The absorbance of samples minus blank Abs was represented versus the dose or day of treatment. Results are mean values of at least four independent experiments performed in triplicate. For propidium iodide cell cycle analysis  $5 \times 10^5$  cells were fixed with EtOH 100% drop by drop while vortexing and stored o/n at 4°C. To stain DNA content, cells were incubated for 30 min at 37°C with 10 mg/ml RNase in PBS/Propidium iodide (Sigma-Aldrich) previous to analysis. Apoptosis was determined using Annexin V-FITC Apoptosis Detection kit (eBioscience, Thermo Fisher) with  $4 \times 10^5$  cells following instructions. Annexin V-FITC was incubated for 10 min at r.t. and propidium iodide staining previous to FACS analysis with BD FACSCanto™ II analyzer (BD Biosciences, San Jose, CA) was done to discriminate necrosis. Cell gate was done in singlet alive cells adjusting autofluorescence and analysis was performed after compensation. Acquired data analysis was performed using WinMDI 2.8 (Joe Trotter, The Scripps Institute, Flow Cytometry Core Facility) or Flowing Software v2.5.1 (Perttu Terho, University of Turku, Finland).

### **Migration Assays**

Wound healing assays were performed in 6 well plates with 90% confluence. Cells were starved at 1% FBS o/n to minimize cell division during migration and 3 scratches/well with a tip were done. Phase contrast images were collected at indicated time points with a light microscope Olympus BX41 (Olympus, Hicksville, NY). Gap distance was measured using Image J software (<https://imagej.nih.gov>)

(NIH, Bethesda, MD) adjusting threshold back/white of sharpen finding edges. Assays using Transwell® chambers of 8 µm pore size (Cultek) were performed incubating the lower and upper inserts of the chamber o/n with complete medium without FBS for indicated times.  $1 \times 10^5$  cells in starvation with 1% FBS o/n were seeded in the insert and cultivated for indicated periods of time. Inserts and wells were washed with PBS and fixed with 4% paraformaldehyde pH 7 for 20 min followed by staining with hematoxylin for 30 min and washing with distilled H<sub>2</sub>O. After insert air-drying, cells were visualized under an upright Microscope and counted in 10 fields doing an average. Migrating cells were calculated by number of cells x 100 / number of cells seeded. At least 3 independent experiments were performed.

#### **Plate soft agar and clonogenic cell survival assay**

2D clonogenic assay was performed by culturing  $1 \times 10^3$  single cells in 6 well plates during 10-12 days. Plates were PBS-washed, and colonies were fixed with 4% formalin solution for 5 min, r.t. and stained with 0.5% Crystal Violet in MeOH for 1 h. Colonies of >25-50 cells were counted to obtain plating efficiency ( $n^\circ$  of colonies counted\*100/ $n^\circ$  of cells plated). Colonies were photographed with an Olympus CX31 microscope and their numbers were counted using Image J in 8-bit format, adjusting the threshold to reduce non-specific background and counted by maxima as described previously (10). For 3D clonogenic tests, colonies were imaged with an Olympus CX31 microscope at 2, 3 and 6 wk. We counted colonies and measured colony diameter using Image J as described in clonogenic survival by analyzing particles. For soft agar assay protocol, 6 well plates with a low layer of 0.5% agar in

DMEM were prepared and kept at 4°C for up to 1 wk.  $5 \times 10^4$  cells were seeded in triplicate in a top layer of 0.4% agarose in DMEM with FBS. Cells were incubated at 37°C in a humidified incubator for 10-50 d replacing complete media twice per wk. Colonies were stained with 0.005% Crystal Violet in MeOH for 90 min. For 3D clonogenic tests, colonies were imaged with an Olympus CX31 microscope at 2, 3 and 6 wk. Colonies were counted using Image J software.

### **RNA extraction of human CRC samples and NanoString gene expression profiling**

An in-house NanoString panel (Suppl. Table S5) on the *nCounter* platform (NanoString Technologies) was used to interrogate gene expression on FFPE tissue, following the manufacturer's protocol. We used a customized gene-panel based on published pre-clinical and clinical research literature (11). Briefly, 10  $\mu$ m-thick sections of formalin-fixed paraffin-embedded (FFPE) tumor tissues were examined by H&E. Only samples with  $\geq 10\%$  of tumor cellularity were processed for RNA purification (High Pure FFPE RNA isolation kit (Roche)). When needed, macro-dissection was performed to enrich tumor cells and minimize stromal components. After excluding samples with suboptimal RNA integrity and content, the remaining samples were included in the *nCounter* analysis. The final set of data ( $n=115$ ) was analyzed on the *nSolver* 4.0 Advanced Analysis module, using default settings to derive differentially expressed genes, pathway scores, and cell types scores. In Kaplan Meier survival plots, high and low *ZEB1* expression patient cohorts were established by using as cut off those in the third highest levels of expression

versus those in the two thirds lowest. Censored patients in Kaplan Meier plots indicated those that were withdrawn from the cohort before the final outcome is observed.

## **SUPPLEMENTARY TABLES**

### **SUPPLEMENTARY TABLE S1: DEG upregulated and downregulated genes in LS174T and RKO with CTLKD and ZEB1KD**

**Top 25 upregulated and 25 downregulated DEG mRNA in LS174T<sup>ZEB1KD</sup> vs LS174T<sup>CTDKD</sup> ranked in descending level of significance**

| <b>Gene symbol</b> | <b>logFC</b> | <b>AveExpr</b> | <b>P.Value</b> | <b>adj.P.Val</b> |
|--------------------|--------------|----------------|----------------|------------------|
| <i>ME1</i>         | -1.44059361  | 0.19610181     | 1.45E-06       | 7.24E-03         |
| <i>NUP42</i>       | -1.28152004  | 3.99697802     | 1.90E-06       | 7.24E-03         |
| <i>MAL2</i>        | -1.26214817  | 2.74358118     | 4.39E-06       | 1.12E-02         |
| <i>GCSH</i>        | -1.19063185  | 4.42528995     | 4.26E-06       | 1.12E-02         |
| <i>H2BC5</i>       | 1.4525145    | 2.53465262     | 9.57E-06       | 1.29E-02         |
| <i>CHML</i>        | -1.54513851  | 4.56332147     | 1.36E-05       | 1.48E-02         |
| <i>SOD3</i>        | 1.57637756   | -0.60309372    | 1.63E-05       | 1.65E-02         |
| <i>SCOC</i>        | -1.33910098  | 0.02143959     | 3.21E-05       | 2.12E-02         |
| <i>FOXJ1</i>       | 2.29038481   | -2.73328803    | 4.48E-05       | 2.47E-02         |
| <i>ZNF587B</i>     | -1.63300874  | 3.4489606      | 5.57E-05       | 2.54E-02         |
| <i>CNIH3</i>       | 1.91958276   | -1.0691996     | 5.99E-05       | 2.54E-02         |
| <i>PCDHGA1</i>     | -2.11793221  | -1.18905044    | 7.89E-05       | 2.87E-02         |
| <i>CASTOR1</i>     | 1.61944237   | 3.46192739     | 8.09E-05       | 2.87E-02         |
| <i>AC011511.4</i>  | -5.61074161  | 0.57201915     | 9.20E-05       | 2.97E-02         |
| <i>RNASE1</i>      | 2.08790214   | -0.09796149    | 9.83E-05       | 2.99E-02         |
| <i>TMEM160</i>     | 1.5778436    | 2.72624262     | 1.18E-04       | 3.15E-02         |
| <i>PLA2G2A</i>     | 1.62329446   | -2.40005877    | 1.20E-04       | 3.15E-02         |
| <i>CYP1A1</i>      | 2.05811033   | 3.32553393     | 1.44E-04       | 3.33E-02         |
| <i>KIF5C</i>       | -2.32048584  | -3.06766268    | 1.52E-04       | 3.41E-02         |
| <i>PUS7L</i>       | -1.37004046  | 4.87993812     | 1.78E-04       | 3.57E-02         |
| <i>BX470111.1</i>  | -3.66346017  | -1.20479609    | 2.07E-04       | 3.71E-02         |
| <i>NLRP2</i>       | -2.16062078  | -3.17143363    | 2.28E-04       | 3.71E-02         |
| <i>PDP1</i>        | -1.19815091  | 6.16836697     | 2.18E-04       | 3.71E-02         |
| <i>INO80B</i>      | 1.2117407    | 4.03251668     | 2.17E-04       | 3.71E-02         |
| <i>CTSA</i>        | 1.23959893   | 6.89173587     | 2.10E-04       | 3.71E-02         |
| <i>AGT</i>         | 1.532966     | -2.93558385    | 2.26E-04       | 3.71E-02         |
| <i>ZNF578</i>      | 2.51089293   | -0.33726498    | 2.43E-04       | 3.75E-02         |
| <i>H2AC8</i>       | 1.49246166   | -0.09074971    | 2.99E-04       | 4.05E-02         |
| <i>PHOSPHO2</i>    | -1.51352997  | 0.43504403     | 3.14E-04       | 4.10E-02         |
| <i>ZBED8</i>       | -1.50851056  | 2.00289303     | 3.22E-04       | 4.13E-02         |
| <i>SLC16A6</i>     | -3.01025129  | -1.82867677    | 3.87E-04       | 4.21E-02         |



|                   |             |             |          |          |
|-------------------|-------------|-------------|----------|----------|
| <i>CCDC85B</i>    | 1.46001087  | 5.84605667  | 4.43E-04 | 4.26E-02 |
| <i>ZNF85</i>      | -2.42777004 | -1.34240114 | 4.88E-04 | 4.30E-02 |
| <i>TRIM59</i>     | -1.20771892 | -0.79756816 | 4.98E-04 | 4.30E-02 |
| <i>EPHA10</i>     | -1.83551457 | -1.41518103 | 5.36E-04 | 4.31E-02 |
| <i>ZNF417</i>     | -1.46127517 | 3.15542819  | 5.34E-04 | 4.31E-02 |
| <i>ZNF117</i>     | -1.80290164 | 2.79586142  | 6.24E-04 | 4.37E-02 |
| <i>C19orf38</i>   | 1.2019278   | -1.45363097 | 6.52E-04 | 4.37E-02 |
| <i>LYZ</i>        | 1.2970269   | 2.00846878  | 6.95E-04 | 4.37E-02 |
| <i>IGFBP6</i>     | 1.34244804  | 4.74098262  | 6.57E-04 | 4.37E-02 |
| <i>AC002996.1</i> | 2.00218314  | 2.0225857   | 6.34E-04 | 4.37E-02 |
| <i>AC022414.1</i> | 3.22403053  | -3.36844232 | 6.93E-04 | 4.37E-02 |
| <i>TPGS1</i>      | 1.33933822  | 2.0309811   | 7.60E-04 | 4.53E-02 |
| <i>ZBTB26</i>     | -1.21133839 | 3.4303338   | 8.27E-04 | 4.55E-02 |
| <i>EMC10</i>      | 1.19912302  | 6.05526028  | 8.19E-04 | 4.55E-02 |
| <i>SLC39A4</i>    | 1.30524162  | 5.12268699  | 8.26E-04 | 4.55E-02 |
| <i>CCL15</i>      | 1.46040186  | -2.6429165  | 8.00E-04 | 4.55E-02 |
| <i>FXYD3</i>      | 1.47213956  | 0.67295277  | 7.96E-04 | 4.55E-02 |
| <i>JAZF1</i>      | -2.79970102 | 0.27025852  | 8.65E-04 | 4.60E-02 |
| <i>ALG10B</i>     | -1.34769375 | 1.81395187  | 9.46E-04 | 4.72E-02 |

**Top 25 upregulated and 25 downregulated DEG mRNA in RKO<sup>ZEB1KD</sup> vs RKO<sup>CTRLKD</sup> ranked in descending level of significance**

| Gene Symbol     | logFC        | AveExpr     | P.Value  | adj.P.Val |
|-----------------|--------------|-------------|----------|-----------|
| <i>PLAU</i>     | 4.277567133  | 4.547482201 | 2.81E-09 | 1.59E-05  |
| <i>ITGA2</i>    | 2.790041557  | 6.680326778 | 1.16E-08 | 4.44E-05  |
| <i>PKP3</i>     | 2.888487962  | 5.851973616 | 1.61E-07 | 3.06E-04  |
| <i>PYGL</i>     | -1.425785455 | 5.337563652 | 3.08E-07 | 3.62E-04  |
| <i>ATP5MC2</i>  | -1.211726409 | 6.881397389 | 8.91E-07 | 6.97E-04  |
| <i>LSG1</i>     | -1.315726147 | 5.59470308  | 1.06E-06 | 7.72E-04  |
| <i>CDC42BPG</i> | 5.165246007  | 3.007421245 | 1.25E-06 | 8.66E-04  |
| <i>SH2D3A</i>   | 4.256826934  | 3.246537857 | 1.32E-06 | 8.75E-04  |
| <i>ZNF165</i>   | 3.954513816  | 3.365706161 | 1.68E-06 | 1.07E-03  |
| <i>EPHA1</i>    | 5.29152613   | 1.768004492 | 1.84E-06 | 1.10E-03  |
| <i>CRB3</i>     | 3.569444039  | 2.464720374 | 2.01E-06 | 1.10E-03  |
| <i>CCDC120</i>  | 3.446060708  | 1.204389015 | 3.63E-06 | 1.82E-03  |
| <i>BSPRY</i>    | 4.710909323  | 1.606117693 | 5.13E-06 | 2.30E-03  |
| <i>SMPDL3B</i>  | 3.384893342  | 2.573482012 | 9.14E-06 | 3.88E-03  |
| <i>TMEM184A</i> | 3.43777413   | 0.278691444 | 1.06E-05 | 4.13E-03  |
| <i>PRRG2</i>    | 3.078524874  | 2.015574376 | 1.16E-05 | 4.24E-03  |
| <i>TMC4</i>     | 2.808941081  | 3.606774676 | 1.16E-05 | 4.24E-03  |

|                    |              |              |          |          |
|--------------------|--------------|--------------|----------|----------|
| <i>ZEB1</i>        | -1.977134026 | 3.682221217  | 1.17E-05 | 4.24E-03 |
| <i>AMOTL1</i>      | 2.907350748  | 0.562410155  | 1.77E-05 | 5.62E-03 |
| <i>RINL</i>        | 3.200621014  | 1.352723356  | 3.42E-05 | 8.03E-03 |
| <i>GET1-SH3BGR</i> | -4.789259075 | -1.128639191 | 3.27E-05 | 8.03E-03 |
| <i>SERPINA3</i>    | -3.352382758 | -1.709196641 | 3.32E-05 | 8.03E-03 |
| <i>RASL10B</i>     | -1.131066971 | -0.918930957 | 3.41E-05 | 8.03E-03 |
| <i>RIPK4</i>       | 3.687302541  | 2.426812059  | 3.94E-05 | 8.59E-03 |
| <i>RAMAC</i>       | -1.204218509 | 4.357487204  | 4.17E-05 | 8.61E-03 |
| <i>C1orf210</i>    | 3.865951924  | 1.100377319  | 5.73E-05 | 1.05E-02 |
| <i>PRKACB</i>      | -3.597450262 | -0.564827465 | 6.07E-05 | 1.06E-02 |
| <i>OAF</i>         | -1.321093438 | 5.177233751  | 7.40E-05 | 1.21E-02 |
| <i>C2orf15</i>     | 2.99564105   | 1.545254813  | 7.67E-05 | 1.24E-02 |
| <i>NSA2</i>        | -1.123459879 | 6.303951056  | 7.87E-05 | 1.26E-02 |
| <i>MPZL2</i>       | 3.743549435  | 1.204550461  | 9.98E-05 | 1.52E-02 |
| <i>ZNF333</i>      | -1.778650006 | 3.142628832  | 1.09E-04 | 1.54E-02 |
| <i>ATG2A</i>       | -1.424981177 | 5.975397035  | 1.06E-04 | 1.54E-02 |
| <i>TFF2</i>        | -3.588530783 | 0.121816517  | 1.27E-04 | 1.72E-02 |
| <i>CPNE7</i>       | -1.436902929 | 4.801940862  | 1.38E-04 | 1.76E-02 |
| <i>TJP3</i>        | 3.902071831  | 3.171939079  | 1.47E-04 | 1.84E-02 |
| <i>LYZ</i>         | -1.854348037 | 2.008468782  | 1.58E-04 | 1.92E-02 |
| <i>FAM151B</i>     | -1.438961368 | -0.688477659 | 1.57E-04 | 1.92E-02 |
| <i>PMEPA1</i>      | -2.192202638 | 0.815389078  | 1.97E-04 | 2.26E-02 |
| <i>HSH2D</i>       | 3.525567938  | 1.381534417  | 3.68E-04 | 3.45E-02 |
| <i>GJB3</i>        | 3.881239898  | 1.326910728  | 3.89E-04 | 3.54E-02 |
| <i>SEC16B</i>      | -2.105867435 | -0.9610908   | 4.53E-04 | 3.92E-02 |
| <i>QPRT</i>        | -2.464660235 | 1.543326389  | 4.56E-04 | 3.93E-02 |
| <i>UCN</i>         | -2.166189709 | -0.673740418 | 4.94E-04 | 4.14E-02 |
| <i>TRPV3</i>       | 3.108518571  | -1.269955448 | 5.39E-04 | 4.32E-02 |
| <i>SLC9B1</i>      | -1.959713099 | -0.853592569 | 5.42E-04 | 4.32E-02 |
| <i>PHTF2</i>       | -1.318327668 | 4.727287005  | 6.18E-04 | 4.64E-02 |
| <i>EHF</i>         | -2.506191156 | 2.652773522  | 6.66E-04 | 4.70E-02 |
| <i>FGD4</i>        | 2.833198172  | 1.43231673   | 6.77E-04 | 4.76E-02 |

**44 DEG mRNA in (RKO<sup>ZEB1KD</sup> vs RKO<sup>CTLKD</sup>) vs (LS174T<sup>ZEB1KD</sup> vs LS174T<sup>CTLKD</sup>) ranked in descending level of significance**

| Gene symbol     | log FC  | P. value | adj.P.Val |
|-----------------|---------|----------|-----------|
| <i>EPHA1</i>    | 5.03273 | 5.02E-06 | 6.38E-03  |
| <i>CDC42BPG</i> | 4.63733 | 7.57E-06 | 7.70E-03  |
| <i>BSPRY</i>    | 4.59432 | 1.10E-05 | 9.22E-03  |
| <i>LCAL1</i>    | 4.48077 | 1.17E-06 | 3.15E-03  |

|                   |          |          |          |
|-------------------|----------|----------|----------|
| <i>ZNF165</i>     | 4.43572  | 4.54E-06 | 6.38E-03 |
| <i>ZSCAN12P1</i>  | 4.32813  | 4.22E-06 | 6.38E-03 |
| <i>AC010503.5</i> | 4.26995  | 7.79E-07 | 3.15E-03 |
| <i>PLAU</i>       | 4.20568  | 8.31E-06 | 7.92E-03 |
| <i>AMOTL1</i>     | 4.14241  | 1.59E-05 | 1.06E-02 |
| <i>SH2D3A</i>     | 4.04400  | 6.37E-06 | 7.45E-03 |
| <i>C10orf55</i>   | 3.71929  | 1.15E-04 | 4.41E-02 |
| <i>TMEM184A</i>   | 3.54973  | 2.30E-05 | 1.40E-02 |
| <i>CCDC120</i>    | 3.25225  | 1.59E-05 | 1.06E-02 |
| <i>CRB3</i>       | 3.18648  | 1.47E-05 | 1.06E-02 |
| <i>HOOK1</i>      | 2.83103  | 2.41E-05 | 1.41E-02 |
| <i>STYK1</i>      | 2.78715  | 1.28E-04 | 4.66E-02 |
| <i>MAL2</i>       | 2.73777  | 1.14E-04 | 4.41E-02 |
| <i>TMC4</i>       | 2.62507  | 5.27E-05 | 2.59E-02 |
| <i>ITGA2</i>      | 2.59052  | 1.24E-06 | 3.15E-03 |
| <i>SPINT2</i>     | 2.54834  | 4.75E-08 | 7.25E-04 |
| <i>OR2A7</i>      | 2.41523  | 6.84E-06 | 7.45E-03 |
| <i>EPCAM</i>      | 2.38175  | 1.12E-06 | 3.15E-03 |
| <i>MPZL3</i>      | 2.28756  | 2.73E-06 | 5.94E-03 |
| <i>PKP3</i>       | 2.26892  | 3.42E-05 | 1.93E-02 |
| <i>ANKEF1</i>     | 1.93464  | 1.70E-05 | 1.08E-02 |
| <i>ZNF33B</i>     | 1.87667  | 1.28E-04 | 4.66E-02 |
| <i>PRSS22</i>     | 1.74476  | 8.71E-05 | 3.80E-02 |
| <i>CHML</i>       | 1.72215  | 3.57E-05 | 1.95E-02 |
| <i>ARHGEF5</i>    | 1.69080  | 2.90E-07 | 2.21E-03 |
| <i>PATJ</i>       | 1.64514  | 3.27E-06 | 6.23E-03 |
| <i>ARHGEF34P</i>  | 1.60866  | 9.59E-06 | 8.60E-03 |
| <i>DMKN</i>       | 1.58814  | 9.64E-05 | 4.06E-02 |
| <i>PICK1</i>      | 1.32230  | 4.81E-05 | 2.45E-02 |
| <i>PLA2G12A</i>   | 1.28323  | 9.84E-05 | 4.06E-02 |
| <i>BCAP29</i>     | 1.21100  | 4.46E-05 | 2.34E-02 |
| <i>RAB27A</i>     | 1.15647  | 1.39E-04 | 4.84E-02 |
| <i>LRRC8B</i>     | 1.14780  | 7.69E-05 | 3.49E-02 |
| <i>MEST</i>       | 1.09361  | 7.77E-05 | 3.49E-02 |
| <i>DDAH1</i>      | 0.88784  | 1.16E-04 | 4.41E-02 |
| <i>ATP5MC2</i>    | -1.45923 | 4.70E-06 | 6.38E-03 |
| <i>QPRT</i>       | -2.94869 | 1.32E-04 | 4.68E-02 |
| <i>LYZ</i>        | -3.15137 | 1.15E-05 | 9.22E-03 |
| <i>TFF2</i>       | -4.23345 | 5.56E-05 | 2.65E-02 |
| <i>SERPINA3</i>   | -4.60475 | 1.31E-05 | 9.96E-03 |

**SUPPLEMENTARY TABLE S2: EMT transcription factors and markers in LS174T and RKO with CTL and ZEB1KD**

**EMT transcription factors in LS174T and RKO with CTLKD and ZEB1KD in descending level of significance**

**LS174T<sup>ZEB1KD</sup> vs LS174T<sup>CTLKD</sup>**

| Gene symbol  | Log FC      | P. value   |
|--------------|-------------|------------|
| <i>ZEB1</i>  | -1.54026617 | 0.00911728 |
| <i>SNAI3</i> | 0.26772993  | 0.71490668 |
| <i>SNAI1</i> | 0.19079734  | 0.73329829 |

**RKO<sup>ZEB1KD</sup> vs RKO<sup>CTLKD</sup>**

| Gene symbol  | Log FC       | P. value   |
|--------------|--------------|------------|
| <i>ZEB1</i>  | -1.0.3747464 | 0.00102783 |
| <i>SNAI3</i> | 0.59897782   | 0.44850933 |
| <i>SNAI1</i> | 0.35173264   | 0.52745689 |

**EMT markers in LS174T and RKO with CTLKD and ZEB1KD in descending level of significance**

**(LS174T<sup>ZEB1KD</sup> vs LS174T<sup>CTLKD</sup>) vs (RKO<sup>ZEB1KD</sup> vs RKO<sup>CTLKD</sup>)**

| Gene symbol   | Log FC      | P. value  |
|---------------|-------------|-----------|
| <i>CLDN1</i>  | -15.4709662 | 2.73e-99  |
| <i>TNC</i>    | 16.4960837  | 4.69e-80  |
| <i>LAMA3</i>  | -15,99914   | 1,47e-78  |
| <i>CDH1</i>   | -15.6705538 | 7.59e-56  |
| <i>FNDC4</i>  | 11.935194   | 4.40e-36  |
| <i>EPCAM</i>  | -3.4089737  | 1.16e-31  |
| <i>VIM</i>    | 6,17253008  | 1.78e-15  |
| <i>TJP3</i>   | -6.07758244 | 1.85e-11  |
| <i>VEGFC</i>  | 9.90554293  | 3.80e-11  |
| <i>LAMC2</i>  | -6,7798754  | 2,71e-08  |
| <i>COL4A4</i> | -4.642      | 2.29e-07  |
| <i>MMP3</i>   | 9.26214286  | 1.26e-06  |
| <i>OCLN</i>   | 0.28402304  | 0.2950938 |

**SUPPLEMENTARY TABLE S3: DEG GSEA pathways upregulated and downregulated in LS174T and RKO with CTLKD and ZEB1KD**

**Top 20 upregulated and 20 downregulated GSEA pathways in LS174T<sup>ZEB1KD</sup> vs LS174T<sup>CTLKD</sup> ranked in descending level of significance**

| GSEA pathway                                                                                                       | pval     | padj     | ES           | NES          |
|--------------------------------------------------------------------------------------------------------------------|----------|----------|--------------|--------------|
| Mitochondrial translation elongation                                                                               | 1.79E-06 | 6.57E-05 | 0.539076564  | 2.758794666  |
| Mitochondrial translation                                                                                          | 1.79E-06 | 6.57E-05 | 0.51975055   | 2.672391711  |
| Mitochondrial protein import                                                                                       | 1.86E-06 | 6.57E-05 | 0.553956805  | 2.48927824   |
| Antigen processing-Cross presentation                                                                              | 1.82E-06 | 6.57E-05 | 0.501205339  | 2.472910642  |
| Degradation of the extracellular matrix                                                                            | 1.84E-06 | 6.57E-05 | 0.525750824  | 2.44830559   |
| Neutrophil degranulation                                                                                           | 1.72E-06 | 6.57E-05 | 0.434443227  | 2.423007542  |
| Regulation of RUNX2 expression and activity                                                                        | 1.83E-06 | 6.57E-05 | 0.49703533   | 2.409963126  |
| Extracellular matrix organization                                                                                  | 1.77E-06 | 6.57E-05 | 0.454613848  | 2.408777213  |
| Arachidonic acid metabolism                                                                                        | 1.90E-06 | 6.57E-05 | 0.617069374  | 2.407545348  |
| The citric acid (TCA) cycle and respiratory electron transport                                                     | 1.80E-06 | 6.57E-05 | 0.471165103  | 2.401176535  |
| Respiratory electron transport                                                                                     | 1.84E-06 | 6.57E-05 | 0.512643832  | 2.400260851  |
| Mitochondrial translation initiation                                                                               | 1.85E-06 | 6.57E-05 | 0.524470267  | 2.399627175  |
| Ephrin signaling                                                                                                   | 1.92E-06 | 6.57E-05 | 0.687535405  | 2.39712225   |
| Heparan sulfate/heparin (HS-GAG) metabolism                                                                        | 1.89E-06 | 6.57E-05 | 0.586425448  | 2.371717074  |
| Mitochondrial translation termination                                                                              | 1.85E-06 | 6.57E-05 | 0.517906125  | 2.369594026  |
| Respiratory electron transport, ATP synthesis by chemiosmotic coupling, and heat production by uncoupling proteins | 1.83E-06 | 6.57E-05 | 0.488726689  | 2.363452423  |
| Formation of the beta-catenin:TCF transactivating complex                                                          | 1.85E-06 | 6.57E-05 | 0.516139847  | 2.340857312  |
| Dectin-1 mediated noncanonical NF-kB signaling                                                                     | 1.88E-06 | 6.57E-05 | 0.557294007  | 2.339063911  |
| Translation                                                                                                        | 1.68E-06 | 6.57E-05 | 0.407096918  | 2.337745809  |
| AUF1 (hnRNP D0) binds and destabilizes mRNA                                                                        | 1.88E-06 | 6.57E-05 | 0.567927734  | 2.33747122   |
| Mitotic Prometaphase                                                                                               | 2.28E-06 | 7.56E-05 | -0.395085687 | -2.110158466 |
| Cilium Assembly                                                                                                    | 2.28E-06 | 7.56E-05 | -0.362545033 | -1.938975662 |
| Resolution of Sister Chromatid Cohesion                                                                            | 4.41E-06 | 1.26E-04 | -0.410700281 | -2.016404651 |
| Amplification of signal from the kinetochores                                                                      | 6.54E-06 | 1.59E-04 | -0.441092599 | -2.078198733 |
| Amplification of signal from unattached kinetochores via a MAD2 inhibitory signal                                  | 6.54E-06 | 1.59E-04 | -0.441092599 | -2.078198733 |
| Mitotic Spindle Checkpoint                                                                                         | 6.59E-06 | 1.59E-04 | -0.418565584 | -2.033139654 |
| Interactions of Rev with host cellular proteins                                                                    | 6.24E-05 | 8.33E-04 | -0.452246012 | -2.007999735 |
| SUMOylation of DNA replication proteins                                                                            | 1.45E-04 | 1.61E-03 | -0.41630671  | -1.894774556 |
| EML4 and NUDC in mitotic spindle formation                                                                         | 1.62E-04 | 1.71E-03 | -0.373867092 | -1.809915724 |
| Signaling by FGFR1 in disease                                                                                      | 2.47E-04 | 2.48E-03 | -0.569860223 | -2.056032286 |
| Insulin processing                                                                                                 | 3.49E-04 | 3.33E-03 | -0.627440428 | -2.065481039 |
| RUNX1 regulates transcription of genes involved in differentiation of keratinocytes                                | 4.22E-04 | 3.98E-03 | -0.809019909 | -2.001527222 |

|                                                                         |          |          |              |              |
|-------------------------------------------------------------------------|----------|----------|--------------|--------------|
| tRNA processing                                                         | 5.72E-04 | 5.11E-03 | -0.349200071 | -1.706990254 |
| M Phase                                                                 | 6.45E-04 | 5.62E-03 | -0.247650696 | -1.44162121  |
| snRNP Assembly                                                          | 7.25E-04 | 6.16E-03 | -0.439339084 | -1.850285592 |
| Metabolism of non-coding RNA                                            | 7.25E-04 | 6.16E-03 | -0.439339084 | -1.850285592 |
| RUNX3 regulates RUNX1-mediated transcription                            | 1.00E-03 | 8.07E-03 | -0.986716691 | -1.528597227 |
| Resolution of D-loop Structures through Holliday Junction Intermediates | 1.10E-03 | 8.57E-03 | -0.508971043 | -1.900893317 |
| Nuclear Pore Complex (NPC) Disassembly                                  | 1.10E-03 | 8.57E-03 | -0.49592609  | -1.894464971 |
| Anchoring of the basal body to the plasma membrane                      | 1.10E-03 | 8.57E-03 | -0.359258964 | -1.702632149 |

**Top 20 upregulated and 20 downregulated DEG GSEA pathways in RKO<sup>ZEB1KD</sup> vs RKO<sup>CTLKD</sup> ranked in descending level of significance**

| GSEA pathway                                                                        | pval     | padj     | ES           | NES          |
|-------------------------------------------------------------------------------------|----------|----------|--------------|--------------|
| rRNA processing                                                                     | 9.27E-06 | 1.73E-03 | 0.356942165  | 1.753814039  |
| rRNA processing in the nucleus and cytosol                                          | 8.78E-06 | 1.73E-03 | 0.361934328  | 1.768726134  |
| HDR through Homologous Recombination (HRR) or Single Strand Annealing (SSA)         | 3.47E-05 | 4.32E-03 | 0.416824233  | 1.841551774  |
| DNA Repair                                                                          | 5.43E-05 | 5.59E-03 | 0.290475809  | 1.47296425   |
| DNA Double-Strand Break Repair                                                      | 6.93E-05 | 6.37E-03 | 0.374917297  | 1.718653138  |
| HDR through Homologous Recombination (HRR)                                          | 8.14E-05 | 6.70E-03 | 0.473433415  | 1.910010136  |
| Homology Directed Repair                                                            | 9.21E-05 | 7.29E-03 | 0.394315232  | 1.756331861  |
| DNA Replication                                                                     | 1.01E-04 | 7.39E-03 | 0.375840798  | 1.710066586  |
| Interactions of Rev with host cellular proteins                                     | 1.14E-04 | 7.80E-03 | 0.462337398  | 1.8759537    |
| RNA Polymerase I Transcription Initiation                                           | 1.30E-04 | 8.64E-03 | 0.468163463  | 1.87798679   |
| Activation of the pre-replicative complex                                           | 1.78E-04 | 1.08E-02 | 0.600075981  | 2.052552069  |
| S Phase                                                                             | 2.32E-04 | 1.27E-02 | 0.337663496  | 1.587059411  |
| Homologous DNA Pairing and Strand Exchange                                          | 2.70E-04 | 1.39E-02 | 0.540137939  | 1.973483225  |
| Major pathway of rRNA processing in the nucleolus and cytosol                       | 3.28E-04 | 1.61E-02 | 0.33100077   | 1.56358304   |
| tRNA processing                                                                     | 3.51E-04 | 1.68E-02 | 0.378805357  | 1.678070351  |
| RNA Polymerase I Transcription                                                      | 3.71E-04 | 1.69E-02 | 0.396912457  | 1.712896653  |
| Resolution of D-loop Structures through Synthesis-Dependent Strand Annealing (SDSA) | 3.63E-04 | 1.69E-02 | 0.624220503  | 2.022947977  |
| Synthesis of DNA                                                                    | 4.73E-04 | 2.05E-02 | 0.36267383   | 1.63621117   |
| Resolution of D-Loop Structures                                                     | 4.77E-04 | 2.05E-02 | 0.563169359  | 1.956336459  |
| RNA Polymerase I Transcription Termination                                          | 4.79E-04 | 2.05E-02 | 0.573936002  | 1.963140611  |
| Degradation of the extracellular matrix                                             | 1.28E-06 | 5.46E-04 | -0.605017546 | -2.227482209 |
| Transcriptional regulation of pluripotent stem cells                                | 1.59E-06 | 5.46E-04 | -0.836160571 | -2.172010546 |
| Class A/1 (Rhodopsin-like receptors)                                                | 1.34E-06 | 5.46E-04 | -0.604113078 | -2.109148423 |
| GPCR ligand binding                                                                 | 1.25E-06 | 5.46E-04 | -0.522140266 | -1.960024149 |
| Extracellular matrix organization                                                   | 1.13E-06 | 5.46E-04 | -0.480357651 | -1.945887721 |
| Signaling by GPCR                                                                   | 1.06E-06 | 5.46E-04 | -0.400030157 | -1.687264301 |
| GPCR downstream signalling                                                          | 2.14E-06 | 6.30E-04 | -0.397640474 | -1.669011839 |

|                                           |          |          |              |              |
|-------------------------------------------|----------|----------|--------------|--------------|
| Formation of the cornified envelope       | 2.92E-06 | 7.50E-04 | -0.682185983 | -2.122890528 |
| Keratinization                            | 4.36E-06 | 9.96E-04 | -0.675489468 | -2.113704047 |
| Nitric oxide stimulates guanylate cyclase | 1.18E-05 | 2.02E-03 | -0.896639065 | -2.002448053 |
| Cell junction organization                | 1.35E-05 | 2.13E-03 | -0.56452546  | -1.96155985  |
| Biological oxidations                     | 2.32E-05 | 3.18E-03 | -0.469236767 | -1.799451915 |
| G alpha (i) signalling events             | 2.19E-05 | 3.18E-03 | -0.426135944 | -1.706921919 |
| Cell-cell junction organization           | 3.58E-05 | 4.32E-03 | -0.616329527 | -1.976847092 |
| Non-integrin membrane-ECM interactions    | 4.23E-05 | 4.83E-03 | -0.600590692 | -1.967666459 |
| cGMP effects                              | 5.12E-05 | 5.54E-03 | -0.892279785 | -1.92877225  |
| Peptide ligand-binding receptors          | 5.99E-05 | 5.87E-03 | -0.605015115 | -1.949161665 |
| TNFs bind their physiological receptors   | 7.42E-05 | 6.37E-03 | -0.793766474 | -1.993621618 |
| Nuclear Receptor transcription pathway    | 7.44E-05 | 6.37E-03 | -0.63307391  | -1.970058956 |
| Phase I - Functionalization of compounds  | 9.78E-05 | 7.39E-03 | -0.547956756 | -1.884767095 |

**Top 20 upregulated and 20 downregulated DEG GSEA pathways in (RKO<sup>ZEB1KD</sup> vs RKO<sup>CTLKD</sup>) vs (LS174T<sup>ZEB1KD</sup> vs LS174T<sup>CTLKD</sup>) ranked in descending level of significance**

| GSEA pathway                                                                      | pval     | padj     | ES           | NES         |
|-----------------------------------------------------------------------------------|----------|----------|--------------|-------------|
| Resolution of Sister Chromatid Cohesion                                           | 1.70E-06 | 1.18E-04 | 0.495058275  | 2.219730167 |
| Mitotic Prometaphase                                                              | 1.62E-06 | 1.18E-04 | 0.447467283  | 2.169939931 |
| Mitotic Spindle Checkpoint                                                        | 1.70E-06 | 1.18E-04 | 0.488478208  | 2.168330087 |
| M Phase                                                                           | 1.50E-06 | 1.18E-04 | 0.346641729  | 1.820780136 |
| Signaling by Rho GTPases                                                          | 1.49E-06 | 1.18E-04 | 0.312057555  | 1.644239016 |
| Amplification of signal from the kinetochores                                     | 3.45E-06 | 1.34E-04 | 0.501817569  | 2.16487538  |
| Amplification of signal from unattached kinetochores via a MAD2 inhibitory signal | 3.45E-06 | 1.34E-04 | 0.501817569  | 2.16487538  |
| EML4 and NUDC in mitotic spindle formation                                        | 3.41E-06 | 1.34E-04 | 0.46823666   | 2.072168873 |
| RHO GTPases Activate Formins                                                      | 8.37E-06 | 3.19E-04 | 0.41732209   | 1.918021846 |
| SUMOylation of DNA replication proteins                                           | 1.05E-05 | 3.85E-04 | 0.498671826  | 2.083491447 |
| Insulin processing                                                                | 1.50E-05 | 5.40E-04 | 0.723483532  | 2.231080422 |
| Interactions of Rev with host cellular proteins                                   | 3.17E-05 | 1.06E-03 | 0.489109673  | 1.996690676 |
| Mitotic Metaphase and Anaphase                                                    | 3.65E-05 | 1.19E-03 | 0.341224563  | 1.695152178 |
| Mitotic Anaphase                                                                  | 4.61E-05 | 1.39E-03 | 0.338871902  | 1.682725539 |
| Mitotic Telophase/Cytokinesis                                                     | 2.22E-04 | 4.80E-03 | 0.770037114  | 2.058028172 |
| Cell Cycle Checkpoints                                                            | 2.22E-04 | 4.80E-03 | 0.317456876  | 1.595637286 |
| Signaling by MST1                                                                 | 3.89E-04 | 7.70E-03 | 0.941757692  | 1.783120385 |
| RHO GTPase Effectors                                                              | 5.34E-04 | 9.80E-03 | 0.297445272  | 1.519064704 |
| Zinc efflux and compartmentalization by the SLC30 family                          | 6.68E-04 | 1.13E-02 | 0.933385256  | 1.767268047 |
| SLC transporter disorders                                                         | 7.69E-04 | 1.25E-02 | 0.453334024  | 1.811743168 |
| Protein localization                                                              | 2.70E-06 | 1.18E-04 | -0.354799457 | -1.85569379 |

|                                                                                                        |          |          |              |              |
|--------------------------------------------------------------------------------------------------------|----------|----------|--------------|--------------|
| Transcriptional regulation by RUNX2                                                                    | 2.54E-06 | 1.18E-04 | -0.38989708  | -1.931231416 |
| Antigen processing-Cross presentation                                                                  | 2.49E-06 | 1.18E-04 | -0.400238048 | -1.93444378  |
| Fatty acid metabolism                                                                                  | 2.50E-06 | 1.18E-04 | -0.421511988 | -2.052963611 |
| Regulation of RUNX2 expression and activity                                                            | 2.46E-06 | 1.18E-04 | -0.440338442 | -2.091933636 |
| Mitochondrial protein import                                                                           | 2.35E-06 | 1.18E-04 | -0.507124792 | -2.233815669 |
| Mitochondrial Fatty Acid Beta-Oxidation                                                                | 2.20E-06 | 1.18E-04 | -0.663638669 | -2.392497021 |
| Influenza Infection                                                                                    | 2.52E-06 | 1.18E-04 | -0.53363207  | -2.617903989 |
| Ribosomal scanning and start codon recognition                                                         | 2.28E-06 | 1.18E-04 | -0.645986508 | -2.64831005  |
| Mitochondrial translation termination                                                                  | 2.37E-06 | 1.18E-04 | -0.596515147 | -2.675080538 |
| Mitochondrial translation initiation                                                                   | 2.37E-06 | 1.18E-04 | -0.605433883 | -2.715076735 |
| Complex I biogenesis                                                                                   | 2.28E-06 | 1.18E-04 | -0.669105548 | -2.722405652 |
| Translation initiation complex formation                                                               | 2.28E-06 | 1.18E-04 | -0.665809168 | -2.729575759 |
| Signaling by ROBO receptors                                                                            | 2.63E-06 | 1.18E-04 | -0.535749053 | -2.749629004 |
| Activation of the mRNA upon binding of the cap-binding complex and eIFs, and subsequent binding to 43S | 2.28E-06 | 1.18E-04 | -0.671314836 | -2.762998019 |
| Influenza Viral RNA Transcription and Replication                                                      | 2.48E-06 | 1.18E-04 | -0.575807872 | -2.766794991 |
| Formation of the ternary complex, and subsequently, the 43S complex                                    | 2.26E-06 | 1.18E-04 | -0.699872533 | -2.78794804  |
| rRNA processing                                                                                        | 2.71E-06 | 1.18E-04 | -0.540941532 | -2.839192088 |
| rRNA processing in the nucleus and cytosol                                                             | 2.68E-06 | 1.18E-04 | -0.548204748 | -2.859769895 |
| The citric acid (TCA) cycle and respiratory electron transport                                         | 2.55E-06 | 1.18E-04 | -0.57648637  | -2.878562053 |



**SUPPLEMENTARY TABLE S4: Demographic and patient characteristics at baseline**

| <b>Characteristics</b>                      | <b>ZEB high (n=38)</b> | <b>ZEB low (n=77)</b> |
|---------------------------------------------|------------------------|-----------------------|
| Median age (range)-yr                       | 60 (32-77)             | 67 (30-86)            |
| >70 years of age-no. (%)                    | 9 (24)                 | 38 (49)               |
| Male sex-no. (%)                            | 14 (37)                | 43 (59)               |
| ECOG performance status score of 0-1-no (%) | 30 (79)                | 50 (66)               |
| MSI-H-no. (%)*                              | 4 (17)                 | 13 (10)               |
| Genotype-no. %**                            |                        |                       |
| -RAS mutant                                 | 11 (29)                | 27 (35)               |
| -BRAF mutant                                | 17 (45)                | 21 (28)               |
| -2WT                                        | 10 (26)                | 28 (37)               |
| Primary location                            |                        |                       |
| - Right side-no. %                          | 18 (47)                | 32 (41)               |
| Stage                                       |                        |                       |
| - Metachronous-no. %                        | - 16 (42)              | - 24 (31)             |
| Surgery primary tumor-no (%)                | 30 (79)                | 51 (66)               |
| Presence of liver metastases-no (%)         | 15 (39)                | 49 (64)               |
| Presence of peritoneal metastases-no (%)    | 16 (42)                | 27 (35)               |
| No. organs affected-no. %                   |                        |                       |
| ->2 organs                                  | 11 (29)                | 37 (48)               |
| ALP>ULN-no (%)***                           | 15 (42)                | 35 (48)               |
| LDH>ULN-no (%)****                          | 11 (30)                | 37 (51)               |
| CEA Mean (range)*****                       | 77.4 (0.9-977)         | 637.5 (0.3-11363)     |

\*3 patients with missing information; \*\* 1 patient with missing information; \*\*\* 6 patients with missing information;\*\*\*\* 7 patients with missing information;\*\*\*\*\*5 patients with missing information

**Abbreviations:** ALP: alkaline phosphatase; CEA: Carcinoembryonic Antigen; ECOG: Eastern Cooperative Oncology Group; LDH: Lactate dehydrogenase; MSI-H: High Microsatellite instability; ULN: upper limit normality.

**SUPPLEMENTARY TABLE S5: Gene signature used in RNA expression by Nanostring**

| <b>Gene related family<br/>(BM2 vs BM1)</b> | <b>Number<br/>of genes</b> | <b>Evaluated genes</b>                                                                                       |
|---------------------------------------------|----------------------------|--------------------------------------------------------------------------------------------------------------|
| Immune-related                              | 17                         | <i>CCL2, IL6, IL17, CCL5, CD8A, FASL, FAS, IL10, IL2, IFNG, TGFB1, ARG1, PD1, IL23, CXCL10, CXCL9, STAT1</i> |
| Sumoylation                                 | 7                          | <i>RANBP2, PIAS3, SAE, UCB9, PIAS2, PIAS1, PIAS4</i>                                                         |
| CAF                                         | 7                          | <i>S100A4, FAP, ACTA2, PDGFC, TGFB3, CXCL12, SMAD4</i>                                                       |
| EMT                                         | 6                          | <i>TWIST, ZEB1, ZEB2, SNAI1, SNAI2, BANC1</i>                                                                |
| BRAF-like signature                         | 5                          | <i>VAV3, DUSP4, RNF43, CDX2, AXIN2</i>                                                                       |
| Apoptosis                                   | 4                          | <i>BCL2, BCL2L1, BIRC5, MCL1</i>                                                                             |
| Angiogenesis                                | 3                          | <i>VEGFA, VEGFB, VEGFC</i>                                                                                   |
| Metalloproteinases                          | 2                          | <i>MMP9, MMP7</i>                                                                                            |
| BRAF-cyclin activation                      | 1                          | <i>RAC1</i>                                                                                                  |

**SUPPLEMENTARY TABLE S6: 20 Genes upregulated/downregulated correlated with ZEB1 in BRAF mutant CRC patients ranked in descending level of significance**

| Gene symbol | p        | corr     | Gene symbol | p      | corr      |
|-------------|----------|----------|-------------|--------|-----------|
| ACTA2       | 1.94E-08 | 0.885654 | CCNO        | 0.0013 | -0.913837 |
| SI2         | 2.63E-06 | 0.81138  | BAX         | 0.0016 | -0.817585 |
| VEGFB       | 5.38E-06 | 0.79674  | TPI1        | 0.0029 | -0.770520 |
| TGFB3       | 0.000156 | 0.708222 | IL32        | 0.0038 | -0.764086 |
| MS4A4A      | 0.00036  | 0.857701 | NOS2        | 0.0064 | -0.735389 |
| TGFB2       | 0.000768 | 0.832965 | CBLC        | 0.0068 | -0.731587 |
| CSF1R       | 0.000983 | 0.823968 | COL17A1     | 0.0088 | -0.716112 |
| NFIL3       | 0.00183  | 0.798888 | PARP4       | 0.0184 | -0.664606 |
| ATM         | 0.00255  | 0.86769  | PDZK1IP1    | 0.0220 | -0.650345 |
| ID4         | 0.00287  | 0.778242 | IRF1        | 0.0293 | -0.626560 |
| DAB2        | 0.003    | 0.776125 | FBP1        | 0.0302 | -0.623719 |
| ZEB2        | 0.00403  | 0.761193 | ENO1        | 0.0323 | -0.817838 |
| KAT2B       | 0.00453  | 0.75493  | IFITM1      | 0.0324 | -0.617376 |
| ITGA1       | 0.00472  | 0.752774 | DTX4        | 0.0352 | -0.609861 |
| COL6A3      | 0.00475  | 0.752458 | TRIM21      | 0.0367 | -0.606176 |
| TGFBR1      | 0.0059   | 0.740268 | CDX2        | 0.0389 | -0.433344 |
| SIRPA       | 0.00855  | 0.717971 | BCL2L1      | 0.0394 | -0.599436 |
| PECAM1      | 0.0088   | 0.716144 | PCK2        | 0.0434 | -0.590000 |
| EPM2AIP1    | 0.00914  | 0.713752 | TNFS9       | 0.0466 | -0.583134 |
| IFI16       | 0.00938  | 0.712022 | EIF4EBP1    | 0.0475 | -0.581096 |

**SUPPLEMENTARY TABLE S7: *BRAF* mutant (V600E) demographic and patient characteristics at baseline**

| Characteristics                             | ZEB high (n=17) | ZEB low (n=21)   |
|---------------------------------------------|-----------------|------------------|
| Median age (range)-yr                       | 65 (42-77)      | 68 (40-84)       |
| >70 years of age-no. (%)                    | 8 (47)          | 11 (52)          |
| Male sex-no. (%)                            | 11 (65)         | 13 (62)          |
| ECOG performance status score of 0-1-no (%) | 12 (70)         | 12 (57)          |
| MSI-H-no. (%)*                              | 3 (27)          | 8 (42)           |
| Primary location                            |                 |                  |
| - Right side-no. %                          | 10 (59)         | 14 (67)          |
| Stage                                       |                 |                  |
| - Metachronous-no.%                         | - 8 (47)        | - 6 (28)         |
| Surgery primary tumor-no (%)                | 13 (76)         | 13 (62)          |
| Presence of liver metastases-no (%)         | 7 (41)          | 10 (48)          |
| Presence of peritoneal metastases-no (%)    | 7 (41)          | 12 (57)          |
| No. organs affected                         |                 |                  |
| ->2 organs                                  | 7 (41)          | 11 (52)          |
| ALP>ULN-no (%)                              | 9 (53)          | 11 (52)          |
| LDH>ULN-no (%)                              | 4 (23)          | 9 (43)           |
| CEA. Mean (range)                           | 100.9 (3-977)   | 409.2 (0.3-7956) |

\*2 patients with missing information;

**RAS mutant demographic and patient characteristics at baseline**

| Characteristics                             | ZEB high (n=12)   | ZEB low (n=23)    |
|---------------------------------------------|-------------------|-------------------|
| Median age (range)-yr                       | 60 (40-75)        | 72 (35-84)        |
| >70 years of age-no. (%)                    | 1 (8)             | 14 (60)           |
| Male sex-no. (%)                            | 5 (42)            | 9 (39)            |
| ECOG performance status score of 0-1-no (%) | 9 (75)            | 13 (57)           |
| MSI-H-no. (%)                               | 0 (0)             | 3 (13)            |
| Primary location                            |                   |                   |
| - Right side-no. %                          | 6 (50)            | 9 (39)            |
| Stage                                       |                   |                   |
| - Metachronous-no.%                         | - 5 (42)          | - 8 (35)          |
| Surgery primary tumor-no (%)                | 10 (83)           | 16 (70)           |
| Presence of liver metastases-no (%)         | 4 (33)            | 19 (83)           |
| Presence of peritoneal metastases-no (%)    | 4 (33)            | 4 (17)            |
| No. organs affected                         |                   |                   |
| ->2 organs                                  | 4 (33)            | 11 (48)           |
| ALP>ULN-no (%)                              | 3 (25)            | 10 (43)           |
| LDH>ULN-no (%)                              | 4 (33)            | 14 (61)           |
| CEA. Mean (range)                           | 38.62 (0.9-111.3) | 635.13 (1.9-7176) |

Abbreviations: ALP: alkaline phosphatase; CEA: Carcinoembryonic Antigen; ECOG: Eastern Cooperative Oncology Group; LDH: Lactate dehydrogenase; MSI-H: High Microsatellite instability; ULN: upper limit normality.

**SUPPLEMENTARY TABLE S8: Type of therapy and activity in *BRAF* mutant patients**

| Variable                                  | <i>ZEB</i> high (n=17) | <i>ZEB</i> low (n=21) |
|-------------------------------------------|------------------------|-----------------------|
| Type of therapy                           |                        |                       |
| - Surgery-no (%)                          | 8                      | 1                     |
| - Systemic therapy-no (%)                 | 9                      | 16                    |
| - Best supportive care-no (%)             | 0                      | 4                     |
| Overall response                          |                        |                       |
| - Partial response%                       | 12                     | 61                    |
| - Stable disease%                         | 62                     | 31                    |
| - Progressive disease%                    | 26                     | 8                     |
| Median progression free survival (95% CI) | 9.2 (5-13.4)           | 7.1 (3.4-10.9)        |
| Median overall survival (95% CI)          | 21.4 (6.3-36.4)        | 7.9 (5-10.7)          |

Abbreviation: CI: confidence interval.

**SUPPLEMENTARY TABLE S9: Univariate analysis of overall survival and progression free survival in *BRAF* mutant CRC patients**

| Overall survival      | B      | SE    | Wald  | df | Sig   | Exp(B) | 95% CI for Exp (B) |       |
|-----------------------|--------|-------|-------|----|-------|--------|--------------------|-------|
|                       |        |       |       |    |       |        | Lower              | Upper |
| Sex                   | 0.024  | 0.415 | 0.003 | 1  | 0.953 | 1.025  | 0.455              | 2.309 |
| ZEB1 higher than mean | -0.988 | 0.474 | 4.344 | 1  | 0.037 | 0.372  | 0.147              | 0.943 |
| Stage                 | 0.505  | 0.433 | 1.362 | 1  | 0.243 | 1.657  | 0.710              | 3.868 |
| LDH higher than ULN   | 0.940  | 0.422 | 4.957 | 1  | 0.026 | 2.560  | 1.119              | 5.856 |
| ALP higher than ULN   | -0.177 | 0.410 | 0.185 | 1  | 0.667 | 0.838  | 0.375              | 1.873 |
| LEU >11.000           | 0.849  | 0.486 | 3.057 | 1  | 0.080 | 2.338  | 0.902              | 6.059 |
| M1 location           | -0.029 | 0.203 | 0.020 | 1  | 0.887 | 0.972  | 0.653              | 1.446 |
| Age of diagnosis      | 0.030  | 0.022 | 1.911 | 1  | 0.167 | 1.030  | 0.988              | 1.075 |

| Progression free survival | B      | SE    | Wald  | df | Sig   | Exp(B) | 95% CI for Exp (B) |       |
|---------------------------|--------|-------|-------|----|-------|--------|--------------------|-------|
|                           |        |       |       |    |       |        | Lower              | Upper |
| Sex                       | 0.490  | 0.356 | 1.900 | 1  | 0.168 | 1.633  | 0.813              | 3.278 |
| ZEB1 higher than mean     | -0.581 | 0.374 | 2.410 | 1  | 0.121 | 0.560  | 0.269              | 1.165 |
| Stage                     | 1.019  | 0.398 | 6.552 | 1  | 0.010 | 2.770  | 1.270              | 6.044 |
| LDH higher than ULN       | 0.477  | 0.378 | 1.596 | 1  | 0.206 | 1.611  | 0.769              | 3.377 |
| ALP higher than ULN       | 0.458  | 0.368 | 1.551 | 1  | 0.213 | 1.581  | 0.769              | 3.252 |
| LEU >11.000               | 0.781  | 0.441 | 3.137 | 1  | 0.077 | 2.184  | 0.920              | 5.183 |
| M1 location               | -0.030 | 0.188 | 0.025 | 1  | 0.875 | 0.971  | 0.671              | 1.404 |
| Age of diagnosis          | 0.021  | 0.017 | 1.502 | 1  | 0.220 | 1.022  | 0.987              | 1.057 |

Abbreviations: ALP: alkaline phosphatase; LDH: Lactate dehydrogenase; LEU: leukocytes per microliter; M1: metastasis; ULN: upper limit normality.

**SUPPLEMENTARY TABLE S10: DNA primers used for genotyping by PCR**

| <b>Mouse Gene</b>                | <b>Forward 5'to 3'</b>      | <b>Reverse 5' to 3'</b>                                             |
|----------------------------------|-----------------------------|---------------------------------------------------------------------|
| <i>Braf</i> <sup>LSL-V600E</sup> | TGAGTATTTTTGTGGCAACTG<br>C  | CTCTGCTGGGAAAGCGGC (mut / wt)                                       |
| <i>Kras</i> <sup>LSL-G12D</sup>  | GTCGACAAGCTCATGCGGG         | CCATGGCTTGAGTAAGTCTGC (mut)<br>CGCAGACTGTAGAGCAGCG (wt)             |
| <i>Vil1</i> <sup>Cre</sup>       | GCCTTCTCCTCTAGGCTCGT        | AGGCAAATTTTGGTGTACGG (mut)<br>TATAGGGCAGAGCTGGAGGA (wt)             |
| <i>Zeb1</i>                      | CCAGAGCCCCAGCACTATTCT<br>CC | TCACACGGCAAACGACTGTCCTG<br>(mut)<br>ACCGCACCTGGTTTACGACACTC<br>(wt) |

**SUPPLEMENTARY TABLE S11: shRNA lentiviral constructs**

| <b>Human Genes</b> | <b>Sequence (5' to 3')</b>                                        | <b>Source</b>            | <b>Catalog Reference</b> |
|--------------------|-------------------------------------------------------------------|--------------------------|--------------------------|
| shCtl              | Not available (proprietary)                                       | Santa Cruz Biotechnology | sc108080V                |
| shZEB1             | GAAGCAGGAUGUACAGUAA<br>GGCGAUAGAUGGUAUUGUA<br>CCAGAACAGUGUUUAUUCU | Santa Cruz Biotechnology | sc38643V                 |



**SUPPLEMENTARY TABLE S12: siRNA oligonucleotides**

| <b>Human Genes</b> | <b>Sequence 5' to 3'</b>  | <b>Reference</b> |
|--------------------|---------------------------|------------------|
| siCtl              | GGUUACGAACUAAGCUAUA       | 12               |
| si <i>BRAF</i>     | AACAGUCUACAAGGGAAAGUG     | 13               |
| si <i>KRAS</i>     | CAGGGUGUUGAUGAUGCCUUCUAUA | 14               |
| si <i>ZEB1</i>     | AACUGAACCUGUGGAUUUAUTT    | 12               |

### **SUPPLEMENTARY TABLE S13: Primary Antibodies**

#### **Primary antibodies used in immunohistochemistry / immunofluorescence**

| <b>Antibody</b>            | <b>Producer</b> | <b>Catalogue</b> | <b>Source</b> | <b>IHQ dilution</b> |
|----------------------------|-----------------|------------------|---------------|---------------------|
| $\beta$ -catenin E247      | Abcam           | ab32572          | Rabbit        | 1:200               |
| CK20 E9                    | SCBT            | sc-271183        | Mouse         | 1:50                |
| Cleaved Caspase 3 (Asp175) | Cell Signaling  | 9661             | Rabbit        | 1:200               |
| E-cadherin clone 36        | BD              | BD 610181        | Mouse         | 1:50                |
| Fibronectin EP5            | SCBT            | sc-8422          | Mouse         | 1:50                |
| KI67                       | Biorbyt         | Orb247042        | Rabbit        | 1:200               |
| Lysozyme EPR2994(2)        | Abcam           | ab108508         | Rabbit        | 1:1000              |
| Occludin E-5               | SCBT            | sc-133256        | Mouse         | 1:50                |
| pAKT1/2/3 B-5              | SCBT            | sc-271966        | Rabbit        | 1:2000              |
| pERK-1/2 E4                | SCBT            | sc-7383          | Mouse         | 1:200               |
| Vimentin RV202             | SCBT            | sc-32322         | Mouse         | 1:50                |
| ZEB1 H102                  | SCBT            | sc-25388         | Rabbit        | 1:50                |
| ZEB1                       | Sigma Aldrich   | HAP027524        | Rabbit        | 1:100               |

#### **Primary antibodies used in Western Blot**

| <b>Antibody</b>           | <b>Producer</b> | <b>Catalogue</b> | <b>Source</b> | <b>WB dilution</b> |
|---------------------------|-----------------|------------------|---------------|--------------------|
| $\alpha$ -tubulin B-5-1-2 | Sigma Aldrich   | T6074            | Mouse         | 1:500              |
| AKT1 C-20                 | SCBT            | sc-1618          | Goat          | 1:500              |
| ERK1 C-16                 | SCBT            | sc-93            | Rabbit        | 1:500              |
| GAPDH 14C10               | Cell Signaling  | 2118L            | Rabbit        | 1:1000             |
| KRAS                      | Proteintech     | 12063-1-AP       | Rabbit        | 1:500              |
| pAKT1/2/3 B5              | SCBT            | sc-271966        | Rabbit        | 1:500              |
| pERK E4                   | SCBT            | sc-7383          | Mouse         | 1:200              |
| BRAF H145                 | SCBT            | sc-9002          | Rabbit        | 1:500              |
| ZEB1 H102                 | SCBT            | sc-25388         | Rabbit        | 1:400              |
| ZEB1                      | Sigma Aldrich   | HPA027524        | Rabbit        | 1:500              |

**SUPPLEMENTARY TABLE S14: DNA primers used for determination of gene expression by qRT-PCR**

| <b>Human Gene</b> | <b>Reference</b> | <b>Forward 5' to 3'</b>          | <b>Reverse 5' to 3'</b>         |
|-------------------|------------------|----------------------------------|---------------------------------|
| <i>ADAM17</i>     | 15               | CTGTGGTGCAAAGCAGAAA              | TGCCAAATGCCTCATATTCA            |
| <i>ARHGAP4</i>    | This study       | CTGCGCTTTGACTACCACC              | CAGTGTGCGCTTCAGAGTCT            |
| <i>BABAM1</i>     | This study       | AGCCCCTGAGGTCCAAATTC             | GAGCCGTTGAACGACTCCAG            |
| <i>BRAF</i>       | 16               | AGAAAGCACTGATGATGAGAG<br>G       | GGAAATATCAGTGTCCCAACCA          |
| <i>CDH1</i>       | 17               | TGCTGCAGGTCTCCTCTTGG             | AGTCCCAGGCGTAGACCAAG            |
| <i>CDC25A</i>     | 18               | AGAGTCAACTAATCCAGAGAAG<br>G      | AGCAACTGTATGAAAGAGATAA<br>CC    |
| <i>CDH1</i>       | 19               | TGAAGGTGACAGAGCCTCTGG<br>AT      | TGGGTGAATTCGGGCTTGTT            |
| <i>CENPF</i>      | 20               | ACGGAAGGTACTGAGTTTGAG<br>CCA     | GAGTTGCCATGGTTGTTCTTCG<br>CA    |
| <i>CLDN1</i>      | 21               | GTCTTGACTCCTTGCTGAATCT<br>G      | CACCTCATCGTCTTCCAAGCAC          |
| <i>GAPDH</i>      | 22               | CGACTTCAACAGCAACTCCCAC<br>TCTTCC | TGGGTGGTCCAGGGTTTCTTAC<br>TCCTT |
| <i>DHRS2</i>      | This study       | ATGGGAATGAGTCTCTCTGGAA           | CGTTGACGTAGCTGGCATC             |
| <i>DICER1</i>     | 23               | AAAATTGTCCATCATGTCTCTCG<br>C     | CCACCAGGTCAGTTGCAGTT            |
| <i>DSC2</i>       | 24               | CGGAGATTGTTGCGGTTGA              | GGAAAGACGTGCTGCTGTATCA          |
| <i>EHF</i>        | 25               | CAGTGCAGTAGTGACCTGTTC            | CTGTGCTACCATAGTTGGTGTC          |
| <i>FAM3C</i>      | This study       | TGAAGGCCATACAAGATGGAA<br>C       | CACAGAAGACCCAGTTGTCTCT<br>A     |
| <i>FGD4</i>       | 26               | TCTCATCAGTCGCTTTGAAGGA           | GGGTTCTAGGAGCATTTAGGTT<br>C     |
| <i>FNDC4</i>      | 27               | TGGTCATCATTGTGGTGGTGTT           | AGAGTCCTCAGGGAAGGCCA            |
| <i>GAPDH</i>      | 28               | TGCACCACCAACTGCTTAGC             | GGCATGGACTGTGGTCATGAG           |
| <i>HOOK1</i>      | 29               | CAGACATTCAATACTGCCTCAC<br>C      | CCCCAACATCCTCTTTAATTCCG         |
| <i>KLK10</i>      | 30               | ACTGCGGAAACAAGCCACT              | CCCTGGTGGTACTTGGGAT             |
| <i>KRAS</i>       | 31               | GGGGAGGGCTTTCTTTGTGTA            | GTCCTGAGCCTGTTTTGTGTC           |
| <i>MDM2</i>       | 32               | GGATCCTTTGCAAGCGCCAC             | TCAAAGGACAGGGACCTGCG            |
| <i>OCN</i>        | 33               | TGGGACAGAGGCTATGGAAC             | ATGCCCAGGATAGCACTCAC            |
| <i>PRDX3</i>      | 34               | ACAGCCGTTGTCAATGGAGAG            | ACGTCGTGAAATTCGTTAGCTT          |
| <i>PYCARD</i>     | This study       | GATCCAGGCCCTCCTCAG               | GCATCTTGCTTGGGTTGGTG            |
| <i>SNAI1</i>      | 35               | TTCCAGCAGCCCTACGACCAG            | GCCTTTCCCACTGTCCTCATC           |
| <i>TFF2</i>       | 36               | TCGTCCTGGGGCTATGTGC              | TGAGACCTCCATGACGCACTG           |
| <i>TICAM2</i>     | This study       | CTCTTGGGGTAAAGGCACA              | TGTTGGCCCCTCTGTTGTAT            |
| <i>TJP3</i>       | 37               | GCTTCCTCAAGGGCAAGAGCA<br>T       | CGTGTGAGGTTCTGGAATGGCA          |
| <i>TMPRSS2</i>    | This study       | GCAGTGGTTTCTTTACGCTGT            | CCGCAAATGCCGTCCAATG             |
| <i>TWIST1</i>     | 38               | CGACGAGCTGGACTCCAAG              | CCTCCATCCTCCAGACCGA             |
| <i>VIM</i>        | 33               | TCTGGATTCACTCCCTCTGG             | CGTGATGCTGAGAAGTTTCG            |

|             |            |                             |                       |
|-------------|------------|-----------------------------|-----------------------|
| <i>ZEB1</i> | 39         | AACTGCTGGCAAGACAAC          | TTGCTGCAGAAATTCTTCCA  |
| <i>ZEB1</i> | 40         | AGCAGTGAAAGAGAAGGGAAT<br>GC | GGTCCTCTTCAGGTGCCTCAG |
| <i>ZEB2</i> | This study | GAAAAGCAGTTCCTTCTGC         | GCCTTGAGTGCTCGATAAGG  |

**SUPPLEMENTARY TABLE S15: Analysis of BM subtype, BOR and survival of published studies of treated *BRAF* mutant mCRC patients**

| Reference  | <i>BRAF</i> patients (n) | Stage | Therapy               | %BM 1/BM2 | BOR BM1/BM2            | Survival BM1/BM2                    | Transcriptomic characteristics BM1  | Transcriptomic characteristics BM2       |
|------------|--------------------------|-------|-----------------------|-----------|------------------------|-------------------------------------|-------------------------------------|------------------------------------------|
| 41         | 218                      | I-IV  | CHT                   | 31/69     | NR                     | BM1<BM2                             | EMT/Immune                          | G2M, E2F targets, glycolysis             |
| 42         | 46                       | IV    | CHT                   | 52/48     | NR                     | BM1=BM2                             | Immune                              | WNT                                      |
| This study | 41                       | IV    | CHT                   | NR        | NR                     | ZEB1 <sub>H</sub> >ZEB <sub>L</sub> | ZEB1 <sub>H</sub> /EMT <sub>L</sub> | ZEB1 <sub>L</sub> /EMT <sub>H</sub>      |
| 43         | 47                       | IV    | Triplet*              | 32/68     | 38/7                   | BM1>BM2                             | Immune                              | E2F, G2M                                 |
| 44         | 460                      | IV    | Triplet/<br>Doublet** | 32/68     | 33.3/14.9<br>19.8/19.6 | NR                                  | Immune<br>MAPK                      | WNT, glycolysis, OXPHOS, MYC, DNA repair |

\* Triplet therapy (dabrafenib, trametinib and panitumumab)

\*\* Triplet therapy (encorafenib, binimetinib and cetuximab) and doublet therapy (encorafenib and cetuximab)

**SUPPLEMENTARY TABLE S16: P values of the Figures**

| Figure        | Comparison                              | Statistical test | P       | Significance |
|---------------|-----------------------------------------|------------------|---------|--------------|
| <b>Fig 1A</b> | KVZ+/+ vs KVZ-/-                        | Log-rank         | 0.0438  | *            |
|               | BVZ+/+ vs BVZ+/-                        | Log-rank         | 0.0086  | **           |
| <b>Fig 1B</b> | colon KVZ+/+ vs KVZ+/- at 4.5m          | 2-tailed t-test  | 0.0001  | ***          |
|               | colon KVZ+/+ vs KVZ+/- at 8m            |                  | 0.0335  | *            |
|               | colon BVZ+/+ vs BVZ+/- at 4.5m          | 2-tailed t-test  | 0.1483  | ns           |
|               | colon BVZ+/+ vs BVZ+/- at 8m            |                  | <0.0001 | ***          |
| <b>Fig 1D</b> | Weight Z+/- vs KVZ+/+                   | Tukey            | <0.0001 | ***          |
|               | Weight KVZ+/+ vs KVZ+/-                 |                  | 0.0868  | ns           |
|               | Weight Z1+/- vs KVZ+/-                  |                  | 0.0004  | ***          |
|               | Weight Z+/- vs BVZ+/+                   |                  | <0.0001 | ***          |
|               | Weight BVZ+/+ vs BVZ+/-                 |                  | 0.0758  | ns           |
|               | Weight Z+/+ vs BVZ+/-                   |                  | <0.0001 | ***          |
| <b>Fig 1E</b> | Liver weigh KVZ+/+ vs KVZ+/-            | Tukey            | 0.0993  | ns           |
|               | Liver weight KVZ+/+ vs Z+/-             |                  | 0.0259  | *            |
|               | Liver weight KVZ+/- vs Z+/-             |                  | 0.8842  | ns           |
|               | Lung weight KVZ+/+ vs KVZ+/-            |                  | 0.3387  | ns           |
|               | Lung weight KVZ+/+ vs Z+/-              |                  | 0.1562  | ns           |
|               | Lung weight KVZ+/- vs Z+/-              |                  | 0.8076  | ns           |
| <b>Fig 1F</b> | Liver weight BVZ+/- high vs BVZ+/+ high | Tukey            | 0.0002  | ***          |
|               | Liver weight BVZ+/- low vs BVZ+/- high  |                  | <0.0001 | ***          |
|               | Liver weight BVZ+/- low vs BVZ+/+ low   |                  | 0.7779  | ns           |
|               | Liver weight BVZ+/+ low vs BVZ+/+ high  |                  | 0.0167  | *            |
|               | Liver weight BVZ+/+ low vs Z+/-         |                  | 0.5725  | ns           |
|               | Liver weight BVZ+/+ high vs Z+/-        |                  | 0.2416  | ns           |
|               | Liver weight BVZ+/- low vs Z+/-         |                  | 0.9953  | ns           |
|               | Liver weight BVZ+/- high vs Z+/-        |                  | <0.0001 | ***          |
| <b>Fig 1G</b> | Lung weight BVZ+/- high vs BVZ+/+ high  | Tukey            | 0.9902  | ns           |
|               | Lung weight BVZ+/- low vs BVZ+/- high   |                  | 0.0002  | ***          |
|               | Lung weight BVZ+/- low vs BVZ+/+ low    |                  | 0.8597  | ns           |
|               | Lung weight BVZ+/+ low vs BVZ+/+ high   |                  | 0.0007  | ***          |
|               | Lung weight BVZ+/+ low vs Z+/-          |                  | 0.9888  | ns           |
|               | Lung weight BVZ+/+ high vs Z+/-         |                  | 0.0030  | **           |
|               | Lung weight BVZ+/- low vs Z+/-          |                  | 0.6755  | ns           |
|               | Lung weight BVZ+/- high vs Z+/-         |                  | 0.0022  | **           |
| <b>Fig 2B</b> | Colon KI67 KVZ+/+ vs KVZ+/-             | MW               | 0.014   | *            |

|               |                                          |        |         |     |
|---------------|------------------------------------------|--------|---------|-----|
|               | Colon $\beta$ -catenin KVZ+/+ vs KVZ+/-  | MW     | 0.152   | ns  |
|               | Colon Cleaved Caspase 3 KVZ+/+ vs KVZ+/- | MW     | 0.1     | ns  |
|               | Colon ZEB1 KVZ+/+ vs KVZ+/-              | MW     | 0.0159  | *   |
|               | Colon Alcian Blue KVZ+/+ vs KVZ+/-       | MW     | 0.0019  | **  |
|               | Colon KI67 BVZ+/+ vs BVZ+/-              | MW     | 0.0244  | *   |
|               | Colon $\beta$ -catenin BVZ+/+ vs BVZ+/-  | MW     | 0.0012  | **  |
|               | Colon Cleaved Caspase 3 BVZ+/+ vs BVZ+/- | MW     | 0.8329  | ns  |
|               | Colon ZEB1 BVZ+/+ vs BVZ+/-              | MW     | 0.0043  | **  |
|               | Colon Alcian Blue BVZ+/+ vs BVZ+/-       | MW     | <0.0001 | *** |
|               | SI KI67 KVZ+/+ vs KVZ+/-                 | MW     | 0.0091  | **  |
|               | SI $\beta$ -catenin KVZ+/+ vs KVZ+/-     | MW     | 0.0114  | *   |
|               | SI Lysozyme KVZ+/+ vs KVZ+/-             | MW     | 0.029   | *   |
|               | SI ZEB1 KVZ+/+ vs KVZ+/-                 | MW     | 0.0031  | **  |
|               | SI Alcian Blue KVZ+/+ vs KVZ+/-          | MW     | 0.7813  | ns  |
|               | SI KI67 BVZ+/+ vs BVZ+/-                 | MW     | <0.0001 | *** |
|               | SI $\beta$ -catenin BVZ+/+ vs BVZ+/-     | MW     | 0.0379  | *   |
|               | SI Lysozyme BVZ+/+ vs BVZ+/-             | MW     | 0.0273  | *   |
|               | SI ZEB1 BVZ+/+ vs BVZ+/-                 | MW     | 0.0003  | *** |
|               | SI Alcian Blue BVZ+/+ vs BVZ+/-          | MW     | 0.0769  | ns  |
| <b>Fig 3A</b> | C pAKT BVZ+/+ vs BVZ+/-                  | MW     | 0.0012  | **  |
|               | C pERK BVZ+/+ vs BVZ+/-                  | MW     | 0.0008  | *** |
|               | SI pAKT BVZ+/+ vs BVZ+/-                 | MW     | 0.0017  | **  |
|               | SI pERK BVZ+/+ vs BVZ+/-                 | MW     | 0.0027  | **  |
| <b>Fig 3B</b> | C E-cadherin KVZ+/+ vs KVZ+/-            | t-test | 0.0033  | **  |
|               | C Vimentin KVZ+/+ vs KVZ+/-              | t-test | 0.8571  | ns  |
|               | SI E-cadherin KVZ+/+ vs KVZ+/-           | t-test | 0.0002  | *** |
|               | SI Vimentin KVZ+/+ vs KVZ+/-             | t-test | 0.9307  | ns  |
|               | C E-cadherin BVZ+/+ vs BVZ+/-            | t-test | 0.0317  | *   |
|               | C Vimentin BVZ+/+ vs BVZ+/-              | t-test | 0.0007  | *** |
|               | SI E-cadherin BVZ+/+ vs BVZ+/-           | t-test | 0.0036  | **  |
|               | SI Vimentin BVZ+/+ vs BVZ+/-             | t-test | 0.7857  | ns  |
| <b>Fig 3C</b> | C E-cadherin KVZ+/+ vs KVZ+/-            | t-test | 0.0002  | *** |
|               | C Occludin KVZ+/+ vs KVZ+/-              | t-test | 0.012   | *   |
|               | C Vimentin KVZ+/+ vs KVZ+/-              | t-test | 0.0002  | *** |
|               | C Fibronectin KVZ+/+ vs KVZ+/-           | t-test | 0.0014  | **  |
|               | C E-cadherin BVZ+/+ vs BVZ+/-            | t-test | 0.0114  | *   |
|               | C Occludin BVZ+/+ vs BVZ+/-              | t-test | 0.0049  | **  |
|               | C Vimentin BVZ+/+ vs BVZ+/-              | t-test | <0.0001 | *** |

|               |                                                   |            |         |     |
|---------------|---------------------------------------------------|------------|---------|-----|
|               | C Fibronectin BVZ+/+ vs BVZ+/-                    | t-test     | 0.0053  | **  |
| <b>Fig 4B</b> | LS174T CTL vs KRASKD                              | Dunnett    | <0.0001 | *** |
|               | LS174T CTL vs ZEB1KD                              |            | <0.0001 | *** |
|               | RKO CTL vs BRAFKD                                 | Dunnett    | 0.0059  | **  |
|               | RKO CTL vs ZEB1KD                                 |            | <0.0001 | *** |
| <b>Fig 4F</b> | <i>ZEB1</i> in ZEB1KD vs CTL in LS174T            | t-test     | 0.0003  | *** |
|               | <i>ZEB2</i> in ZEB1KD vs CTL in LS174T            | t-test     | 0.7107  | ns  |
|               | <i>SNAI1</i> in ZEB1KD vs CTL in LS174T           | t-test     | 0.0564  | ns  |
|               | <i>TWIST</i> in ZEB1KD vs CTL in LS174T           | t-test     | 0.1538  | ns  |
|               | <i>ZEB1</i> in ZEB1KD vs CTL in RKO               | t-test     | <0.0001 | *** |
|               | <i>ZEB2</i> in ZEB1KD vs CTL in RKO               | t-test     | 0.763   | ns  |
|               | <i>SNAI1</i> in ZEB1KD vs CTL in RKO              | t-test     | 0.3716  | ns  |
|               | <i>TWIST</i> in ZEB1KD vs CTL in RKO              | t-test     | 0.8422  | ns  |
| <b>Fig 5A</b> | <i>KRAS</i> mut CTL vs ZEB1 KD 24h                | Bonferroni | <0.0001 | *** |
|               | <i>KRAS</i> mut CTL vs ZEB1 KD 48h                |            | <0.0001 | *** |
|               | <i>KRAS</i> mut CTL vs ZEB1 KD 72h                |            | <0.0001 | *** |
|               | <i>BRAF</i> mut CTL vs ZEB1 KD 24h                | Bonferroni | >0.9999 | ns  |
|               | <i>BRAF</i> mut CTL vs ZEB1 KD 48h                |            | >0.9999 | ns  |
|               | <i>BRAF</i> mut CTL vs ZEB1 KD 72h                |            | 0.0114  | **  |
| <b>Fig 5B</b> | <i>KRAS</i> mut G0 CTL vs G0 Z1KD                 | t-test     | 0.0439  | *   |
|               | <i>KRAS</i> mut G1 CTL vs G1 Z1KD                 | t-test     | 0.36    | ns  |
|               | <i>KRAS</i> mut S CTL vs S Z1KD                   | t-test     | 0.3425  | ns  |
|               | <i>KRAS</i> mut G2/M CTL vs G2/M Z1KD             | t-test     | 0.0082  | **  |
|               | <i>BRAF</i> mut G0 CTL vs G0 Z1KD                 | t-test     | 0.1062  | ns  |
|               | <i>BRAF</i> mut G1 CTL vs G1 Z1KD                 | t-test     | 0.0011  | **  |
|               | <i>BRAF</i> mut S CTL vs S Z1KD                   | t-test     | 0.1219  | ns  |
|               | <i>BRAF</i> mut G2/M CTL vs G2/M Z1KD             | t-test     | 0.0046  | **  |
| <b>Fig 5C</b> | <i>KRAS</i> MUT % Annex CTL vs ZEB1KD             | t-test     | 0.0276  | *   |
|               | <i>BRAF</i> MUT % Annex CTL vs ZEB1KD             | t-test     | 0.7204  | ns  |
| <b>Fig 5D</b> | <i>KRAS</i> 2D platting eff % Annex CTL vs ZEB1KD | t-test     | 0.0078  | **  |
|               | <i>BRAF</i> 2D platting eff % Annex CTL vs ZEB1KD | t-test     | 0.2602  | ns  |
| <b>Fig 5E</b> | <i>KRAS</i> 3D platting eff % Annex CTL vs ZEB1KD | t-test     | 0.045   | *   |
|               | <i>BRAF</i> 3D platting eff % Annex CTL vs ZEB1KD | t-test     | 0.0444  | *   |
| <b>Fig 5F</b> | <i>KRAS</i> mut wound area CTL vs ZEB1KD 24h      | Bonferroni | >0.9999 | ns  |
|               | <i>KRAS</i> mut wound area CTL vs ZEB1KD 48h      |            | <0.0001 | *** |
|               | <i>KRAS</i> mut wound area CTL vs ZEB1KD 96h      |            | <0.0001 | *** |
|               | <i>BRAF</i> mut wound area CTL vs ZEB1KD 6h       | Bonferroni | 0.5209  | ns  |
|               | <i>BRAF</i> mut wound area CTL vs ZEB1KD 24h      |            | 0.3132  | ns  |



|               |                                                 |             |         |     |
|---------------|-------------------------------------------------|-------------|---------|-----|
|               | <i>BRAF</i> mut wound area CTL vs ZEB1KD 48h    |             | 0.9309  | ns  |
| <b>Fig 5G</b> | <i>KRAS</i> mut % migrating cells CTL vs ZEB1KD | t-test      | <0.001  | *** |
|               | <i>BRAF</i> mut % migrating cells CTL vs ZEB1KD | t-test      | 0.2503  | ns  |
| <b>Fig 5H</b> | Mice LS174T CTL vs ZEB1KD                       | 2-way ANOVA | 0.0003  | *** |
|               | <i>Ex vivo</i> Mice LS174T CTL vs ZEB1KD        | t-test      | 0.0147  | *   |
| <b>Fig 5I</b> | Mice RKO CTL vs ZEB1 KD                         | 2-way ANOVA | <0.0001 | *** |
|               | <i>Ex vivo</i> Mice RKO CTL vs ZEB1 KD          | t-test      | 0.036   | *   |
| <b>Fig 6E</b> | <i>KRAS</i> mut ZEB1KD vs CTL <i>FAM3C</i>      | t-test      | 0.0036  | **  |
|               | <i>KRAS</i> mut KRASKD vs CTL <i>FAM3C</i>      | t-test      | 0.0053  | **  |
|               | <i>KRAS</i> mut ZEB1KD vs CTL <i>KLK10</i>      | t-test      | 0.0089  | **  |
|               | <i>KRAS</i> mut KRASKD vs CTL <i>KLK10</i>      | t-test      | <0.0001 | *** |
|               | <i>KRAS</i> mut ZEB1KD vs CTL <i>DHRS2</i>      | t-test      | 0.0164  | *   |
|               | <i>KRAS</i> mut KRASKD vs CTL <i>DHRS2</i>      | t-test      | <0.0001 | *** |
|               | <i>KRAS</i> mut ZEB1KD vs CTL <i>PRDX3</i>      | t-test      | 0.0075  | **  |
|               | <i>KRAS</i> mut KRASKD vs CTL <i>PRDX3</i>      | t-test      | 0.0004  | *** |
|               | <i>KRAS</i> mut ZEB1KD vs CTL <i>BABAM1</i>     | t-test      | 0.0059  | **  |
|               | <i>KRAS</i> mut KRASKD vs CTL <i>BABAM1</i>     | t-test      | <0.0001 | *** |
|               | <i>KRAS</i> mut ZEB1KD vs CTL <i>ADAM17</i>     | t-test      | 0.0138  | *   |
|               | <i>KRAS</i> mut KRASKD vs CTL <i>ADAM17</i>     | t-test      | 0.0006  | *** |
|               | <i>KRAS</i> mut ZEB1KD vs CTL <i>MDM2</i>       | t-test      | 0.0027  | **  |
|               | <i>KRAS</i> mut KRASKD vs CTL <i>MDM2</i>       | t-test      | 0.0066  | **  |
|               | <i>KRAS</i> mut ZEB1KD vs CTL <i>CEINPF</i>     | t-test      | 0.0047  | **  |
|               | <i>KRAS</i> mut KRASKD vs CTL <i>CEINPF</i>     | t-test      | <0.0001 | *** |
|               | <i>KRAS</i> mut ZEB1KD vs CTL <i>DICER1</i>     | t-test      | 0.0026  | **  |
|               | <i>KRAS</i> mut KRASKD vs CTL <i>DICER1</i>     | t-test      | 0.0084  | **  |
|               | <i>KRAS</i> mut ZEB1KD vs CTL <i>TICAM2</i>     | t-test      | 0.0003  | *** |
|               | <i>KRAS</i> mut KRASKD vs CTL <i>TICAM2</i>     | t-test      | 0.0049  | **  |
|               | <i>KRAS</i> mut ZEB1KD vs CTL <i>CDC25A</i>     | t-test      | 0.03    | *   |
|               | <i>KRAS</i> mut KRASKD vs CTL <i>CDC25A</i>     | t-test      | 0.0204  | *   |
|               | <i>BRAF</i> mut ZEB1KD vs CTL <i>FAM3C</i>      | t-test      | <0.0001 | *** |
|               | <i>BRAF</i> mut BRAFKD vs CTL <i>FAM3C</i>      | t-test      | 0.0233  | *   |
|               | <i>BRAF</i> mut ZEB1KD vs CTL <i>KLK10</i>      | t-test      | <0.0001 | *** |
|               | <i>BRAF</i> mut BRAFKD vs CTL <i>KLK10</i>      | t-test      | 0.001   | *** |
|               | <i>BRAF</i> mut ZEB1KD vs CTL <i>DHRS2</i>      | t-test      | 0.0003  | *** |
|               | <i>BRAF</i> mut BRAFKD vs CTL <i>DHRS2</i>      | t-test      | 0.001   | *** |
|               | <i>BRAF</i> mut ZEB1KD vs CTL <i>PRDX3</i>      | t-test      | 0.0006  | *** |
|               | <i>BRAF</i> mut BRAFKD vs CTL <i>PRDX3</i>      | t-test      | 0.0025  | **  |
|               | <i>BRAF</i> mut ZEB1KD vs CTL <i>BABAM1</i>     | t-test      | <0.0001 | *** |

|               |                                                 |          |         |     |
|---------------|-------------------------------------------------|----------|---------|-----|
|               | <i>BRAF</i> mut BRAFKD vs CTL <i>BABAM1</i>     | t-test   | 0.001   | *** |
|               | <i>BRAF</i> mut ZEB1KD vs CTL <i>DSC2</i>       | t-test   | 0.0002  | *** |
|               | <i>BRAF</i> mut BRAFKD vs CTL <i>DSC2</i>       | t-test   | 0.0102  | *   |
|               | <i>BRAF</i> mut ZEB1KD vs CTL <i>TFF2</i>       | t-test   | 0.0293  | *   |
|               | <i>BRAF</i> mut BRAFKD vs CTL <i>TFF2</i>       | t-test   | 0.0135  | *   |
|               | <i>BRAF</i> mut ZEB1KD vs CTL <i>HOOK1</i>      | t-test   | 0.0236  | *   |
|               | <i>BRAF</i> mut BRAFKD vs CTL <i>HOOK1</i>      | t-test   | 0.0251  | *   |
|               | <i>BRAF</i> mut ZEB1KD vs CTL <i>ARHGAP4</i>    | t-test   | 0.0004  | *** |
|               | <i>BRAF</i> mut BRAFKD vs CTL <i>ARHGAP4</i>    | t-test   | 0.0217  | *   |
|               | <i>BRAF</i> mut ZEB1KD vs CTL <i>TMPRSS2</i>    | t-test   | 0.0152  | *   |
|               | <i>BRAF</i> mut BRAFKD vs CTL <i>TMPRSS2</i>    | t-test   | 0.0311  | *   |
|               | <i>BRAF</i> mut ZEB1KD vs CTL <i>FGD4</i>       | t-test   | 0.0352  | *   |
|               | <i>BRAF</i> mut BRAFKD vs CTL <i>FGD4</i>       | t-test   | 0.0031  | **  |
|               | <i>BRAF</i> mut ZEB1KD vs CTL <i>PYCARD</i>     | t-test   | <0.0001 | *** |
|               | <i>BRAF</i> mut BRAFKD vs CTL <i>PYCARD</i>     | t-test   | 0.0046  | **  |
|               | <i>BRAF</i> mut ZEB1KD vs CTL <i>EHF</i>        | t-test   | 0.0063  | **  |
|               | <i>BRAF</i> mut BRAFKD vs CTL <i>EHF</i>        | t-test   | 0.0055  | **  |
| <b>Fig 6F</b> | <i>BRAF</i> mut CRC CTL vs ZEB1KD EMT signature | t-test   | 0.1     | ns  |
| <b>Fig 6G</b> | <i>CDH1</i> ZEB1 KD vs CTL KD in LS174T         | t-test   | 0.416   | ns  |
|               | <i>TJP3</i> ZEB1KD vs CTL KD in LS174T          | t-test   | 0.5072  | ns  |
|               | <i>OCLN</i> ZEB1 KD vs CTL KD in LS174T         | t-test   | 0.0144  | *   |
|               | <i>CLDN1</i> ZEB1 KD vs CTL KD in LS174T        | t-test   | 0.0425  | *   |
|               | <i>VIM</i> ZEB1KD vs CTL KD in LS174T           | t-test   | 0.0182  | *   |
|               | <i>FNDC4</i> ZEB1 KD vs CTL KD in LS174T        | t-test   | 0.8801  | ns  |
|               | <i>CDH1</i> ZEB1 KD vs CTL KD in RKO            | t-test   | 0.0176  | *   |
|               | <i>TJP3</i> ZEB1KD vs CTL KD in RKO             | t-test   | 0.1598  | ns  |
|               | <i>OCLN</i> ZEB1 KD vs CTL KD in RKO            | t-test   | 0.3724  | ns  |
|               | <i>CLDN1</i> ZEB1 KD vs CTL KD in RKO           | t-test   | 0.0202  | *   |
|               | <i>VIM</i> ZEB1KD vs CTL KD in RKO              | t-test   | 0.0194  | *   |
|               | <i>FNDC4</i> ZEB1 KD vs CTL KD in RKO           | t-test   | 0.0206  | *   |
| <b>Fig 7D</b> | PFS <i>ZEB1</i> low versus <i>ZEB1</i> high     | Log rank | 0.0513  | ns  |
| <b>Fig 7E</b> | OS <i>ZEB1</i> low versus <i>ZEB1</i> high      | Log-rank | 0.0405  | *   |

## **SUPPLEMENTARY REFERENCES**

1. Dankort D, et al. A new mouse model to explore the initiation, progression and therapy of BRAFV600E-induced lung tumors. *Genes Dev.* 2007; 21(4):379-384.
2. Jackson EL, et al. Analysis of lung tumor initiation and progression using conditional expression of oncogenic K-ras. *Genes Dev.* 2001;15(24):3243-3248.
3. Madison BB, et al. Cis Elements of the Villin Gene Control expression in restricted domains of the vertical (crypt) and horizontal (duodenum, cecum) axes of the intestine. *J Biol Chem.* 2022;277(36):33275-33283.
4. Takagi T, et al.  $\delta$ EF1, a zinc-finger and homeodomain transcription factor, is required for skeleton patterning in multiple lineages. *Development.* 1998;125(1):21-31.
5. Li B, Dewey CN. RSEM: accurate transcript quantification from RNA-Seq data with or without a reference genome. *BMC Bioinformatics.* 2011;12:323.
6. Law CW, et al. voom: Precision weights unlock linear model analysis tools for RNA-seq read counts. *Genome Biol.* 2014;15(2):R29.
7. Korotkevich G, et al. Fast gene set enrichment analysis [preprint]. <https://doi.org/10.1101/060012>. Posted on *bioRxiv* February 01, 2021.
8. Yu G, et al. clusterProfiler: an R package for comparing biological themes among gene clusters. *OMICS.* 2012;16(5):284-287.
9. Barbie DA, et al. Systematic RNA interference reveals that oncogenic KRAS-driven cancers require TKB1. *Nature.* 2009;462(7269):108-112.
10. Rafehi H, et al. Clonogenic assay: adherent cells. *J Vis Exp.* 2011;13(49):2573.
11. Pedrosa L, et al. The tumor microenvironment in colorectal cancer therapy. *Cancers.* 2019;11(8):1172.
12. Sánchez-Tilló E, et al. ZEB1 Promotes invasiveness of colorectal carcinoma cells through the opposing regulation of uPA and PAI-1. *Clin Cancer Res.* 2013;19(5):1071-1082.
13. Calleros L, et al. Oncogenic Ras, but not (V600E)B-RAF, protects from cholesterol depletion-induced apoptosis through the PI3K/AKT pathway in colorectal cancer cells. *Carcinogenesis.* 2009;30(10):1670-1677.

14. Al-Ghamdi S., et al. Cten is targeted by Kras signalling to regulate cell motility in the colon and pancreas. *PLoS One*. 2011;6(6):e20919.
15. Fu YR, et al. MicroRNA miR-21 attenuates human cytomegalovirus replication in neural cells by targeting Cdc25a. *J Virol*. 2015;89(2):1070-1082.
16. Bailey AM, et al. FXR silencing in human colon cancer by DNA methylation and KRAS signaling. *Am J Physiology Gastrointest Liver Physiol*. 2014;306(1):G48-58.
17. Dobin A, et al. STAR: ultrafast universal RNA-seq aligner. *Bioinformatics*. 2013;29(1):15-21.
18. Dulloo I, et al. Hypoxia-inducible TAp73 supports tumorigenesis by regulating the angiogenic transcriptome. *Nat Cell Biol*. 2015;17(4):511-523.
19. Ding X, et al. MiR-137-3p Inhibits Colorectal Cancer Cell Migration by Regulating a KDM1A-Dependent Epithelial–Mesenchymal Transition. *Dig Dis Sci*. 2021;66(7):2272-2282.
20. Yang S, et al. BMP-6 promotes E-cadherin expression through repressing  $\delta$ EF1 in breast cancer cells. *BMC Cancer*. 2007;7:211-224.
21. Tu Y, et al. Upregulation of hsa-miR-31-3p induced by ultraviolet affects keratinocytes permeability barrier by targeting CLDN1. *Biochem Biophys Res Commun*. 2020;532(4):626-632.
22. Peña C, et al. E-cadherin and vitamin D receptor regulation by SNAIL and ZEB1 in colon cancer: Clinicopathological correlations. *Hum Mol Genet*. 2005;14(22):3361-3370.
23. Khan K, et al. Desmocollin switching in colorectal cancer. *Br J Cancer*. 2006;95(10):1367-1370.
24. Zhang Y, et al. Frequent transcriptional inactivation of Kallikrein 10 gene by CpG island hypermethylation in non-small cell lung cancer. *Cancer Sci*. 2010;101(4):934-940.
25. Cheng J, et al. Circ\_0007624 suppresses the development of esophageal squamous cell carcinoma *via* targeting miR-224-5p/CPEB3 to inactivate the EGFR/PI3K/AKT signaling. *Cell Signal*. 2022;99:110448.
26. Dai X, et al. Circular RNA circFGD4 suppresses gastric cancer progression via modulating miR-532-3p/APC/ $\beta$ -catenin signalling pathway. *Clin Sci (Lond)*. 2020;134(13):1821-1839.

27. Fröhbeek G, et al. FNDC4, a novel adipokine that reduces lipogenesis and promotes fat browning in human visceral adipocytes. *Metabolism*. 2020;108:154261.
28. Gilliver SC, et al. Sex dimorphism in wound healing: the roles of sex steroids and macrophage migration inhibitory factor. *Endocrinology*. 2008;149(11):5747-57.
29. Liu K, et al. Regulation of p53 by TopBP1: a Potential Mechanism for p53 Inactivation in Cancer. *Mol Cell Biol*. 2009;29(10):2673-2693.
30. Saini JS, et al. Nicotinamide Ameliorates Disease Phenotypes in a Human iPSC Model of Age-Related Macular Degeneration. *Cell Stem Cell*. 2017;20(5):635-647.
31. de Freitas A, et al. Identification of TLT2 as an engulfment receptor for apoptotic cells. *J Immunol*. 2012;188(12):6381-6388.
32. Choi HS, et al. Identification of hepatotoxicity related genes induced by toxaphene in HepG2 cells. *Mol Cell Toxicol*. 2011;7(1):53-60.
33. Kim MS, et al. MEST induces Twist-1-mediated EMT through STAT3 activation in breast cancer. MEST induces Twist-1-mediated EMT through STAT3 activation in breast cancers. *Cell Death Differ*. 2019;26(12):2594-2606.
34. Yingnan Y. (2010-08-20) Functional Studies of Y-Box Binding protein 1 in breast cancer. ScholarBank@NUS Repository.
35. Guaita S, et al. Snail Induction of Epithelial to Mesenchymal Transition in Tumor Cells Is Accompanied by *MUC1* Repression and *ZEB1* Expression. *J Biol Chem*.. 2002;277(42):39209-39216.
36. Liu J, et al. The regulation of trefoil factor 2 expression by the transcription factor Sp3. *Biochem Biophys Res Comm* 2012;427(2):410-414.
37. Saygili E, et al. A drug-responsive multicellular human spheroid model to recapitulate drug-induced pulmonary fibrosis. *Biomed Mater*. 2022;17(4):5021.
38. Takeshi K, et al. Generation of human hepatic progenitor cells with regenerative and metabolic capacities from primary hepatocytes. *eLife*. 2019;8:e47313.
39. Shuai L, et al. Hepato-specific micro RNA-122 facilitates accumulation of newly synthesized miRNA through regulating PRKRA. *Nucleic Acids Res*. 2012;40(2):884-891.

40. Zhang GJ, et al. High expression of ZEB1 correlates with liver metastasis and poor prognosis in colorectal cancer. *Oncol Lett*. 2013;5(2):564-568.
41. Barras D, et al. BRAFV600E mutant colorectal cancer subtypes based on gene expression. *Clin Cancer Res*. 2017;23(1):104-115.
42. Moretto R, et al. Exploring clinical and gene expression markers of benefit from FOLFOXIRI/bevacizumab in patients with BRAF-mutated metastatic colorectal cancer: Subgroup analysis of the TRIBE2 study. *Eur J Cancer*. 2021;153:16-26.
43. Middleton G, et al. *BRAF*-Mutant Transcriptional subtypes predict outcome of combined BRAF, MEK, and EGFR blockade with dabrafenib, trametinib, and panitumumab in patients with Colorectal Cancer. *Clin Cancer Res*. 2020;26(11):2466-2476.
44. Kopetz S, et al. Encorafenib, Binimetinib, and Cetuximab in BRAF V600E-Mutated Colorectal Cancer. *N Engl J Med*. 2019;381:1632-1643.

## **LEGENDS TO SUPPLEMENTARY FIGURES**

### **SUPPLEMENTARY FIGURE S1**

(A) Individual stainings of Fig. 3C. Scale bar 20 $\mu$ m. (B) Lysates from LS174T and RKO cells incubated with PD98059, LY294002 or with their solvent (Untr) were immunoblotted for pERK1/2, ERK, pAKT and GAPDH. (C) Reduced expression of ZEB1 by siRNA. Lysates from LS174T and RKO cells interfered with siCtl (*CTL*) or siZEB1 (*ZEB1KD*) were blotted for ZEB1 and GAPDH. (D) Reduced expression of ZEB1 by lentiviral transduction. Lysates from LS174T and RKO cells stably interfered with a control lentivirus (*CTL*) or against *ZEB1* (*ZEB1KD*) were blotted for ZEB1 and GAPDH or  $\alpha$ -tubulin. (E) Heatmap of leading edge genes involved in the enrichment score of EMT process in *BRAF* mut CRC in presence or absence of *ZEB1* (n=3), corresponding to Fig. 6F. At least three independent experiments were done.

### **SUPPLEMENTARY FIGURE S2**

(A) Heatmap of EMT transcription factors in *BRAF* mut CRC patients of Fig. 7B.

# Supplementary Figure 1

**A**

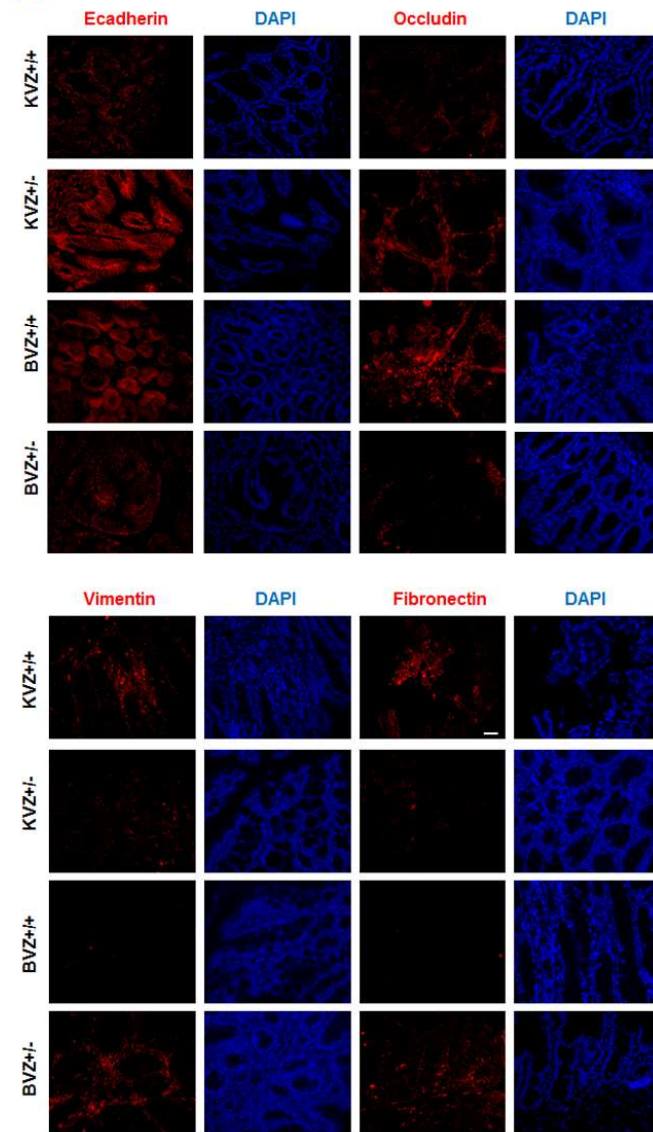

**B**

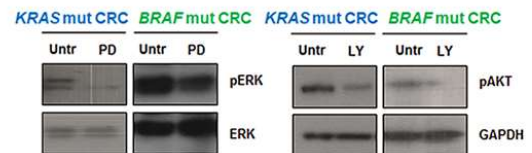

**E**

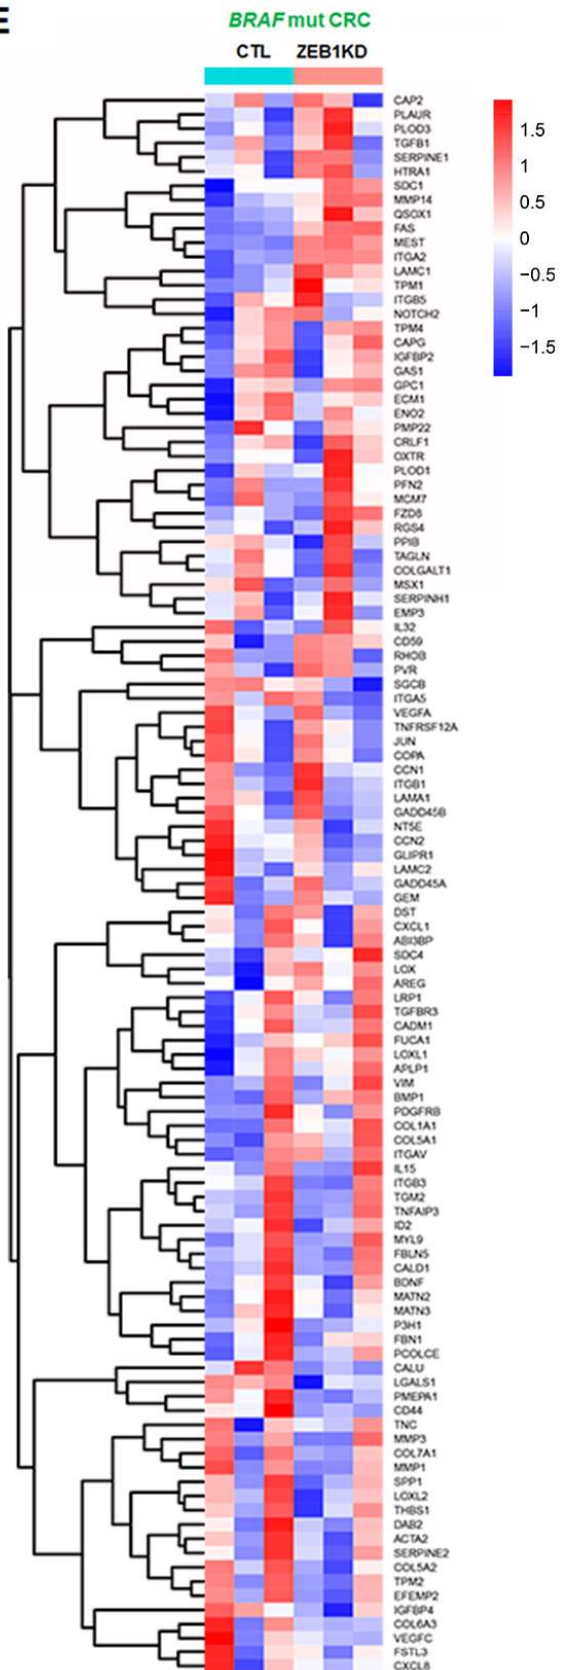

**C**

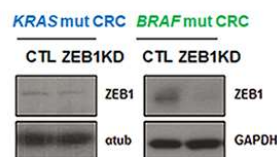

**D**

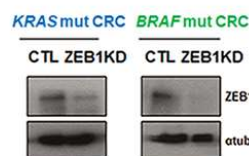



Supplementary Figure 2

A

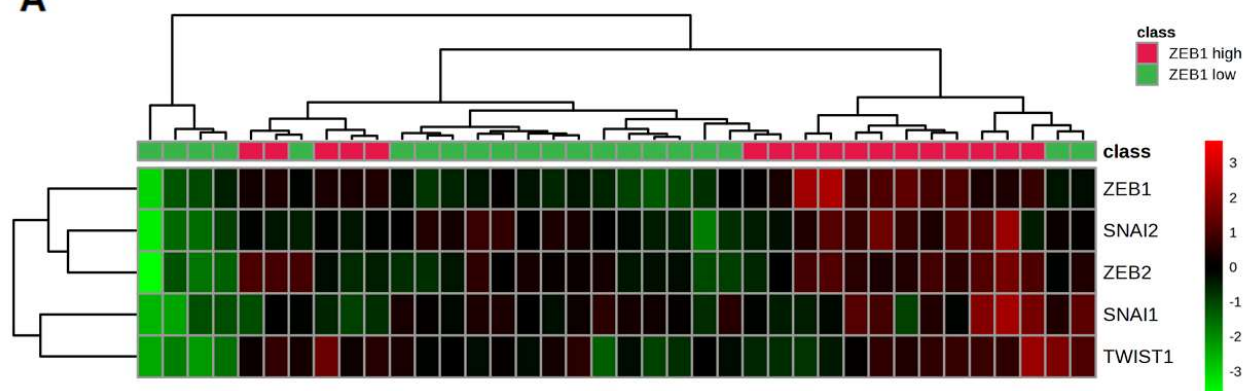

Supplement: sd1 [file 1]
